# Supplementary material for: The effects of graded levels of calorie restriction: IV. Non-linear change in behavioural phenotype of mice in response to short-term calorie restriction
Source: PubMed Central journal article supplement (PMC4548231; doi:10.1038/srep13198), 2015-08-25

1 **Non-linear change in behavioural phenotype of male C57BL/6 mice in**  
2 **response to short-term graded caloric restriction**

3 **Supplementary Information**

4  
5 David Lusseau<sup>1†\*</sup>, Sharon E. Mitchell<sup>1†\*</sup>, Ceres Barros<sup>1</sup>, Davina Deros<sup>1</sup>, Cara Green<sup>1</sup>, Luonan  
6 Chen<sup>2</sup>, Jing-Dong Jackie Han<sup>3</sup>, Yingchun Wang<sup>4</sup>, Daniel E.L. Promislow<sup>5</sup>, Alex Douglas<sup>1</sup> and  
7 John R. Speakman<sup>1,4\*</sup>

8 1. Institute of Biological and Environmental Sciences, University of Aberdeen, Aberdeen, Scotland,  
9 UK Ab24 2TZ

10 2. Key laboratory of Systems Biology, Shanghai Institute of Biological Sciences, Chinese Academy of  
11 Sciences, 800 Cao Bao road, Shanghai, China

12 3. Max Planck partner institute for computational biology , Shanghai

13 4. State Key laboratory of Molecular Developmental Biology, Institute of Genetics and  
14 Developmental Biology, Chinese Academy of Sciences, 1 Beichen Xilu, Chaoyang, Beijing, China

15 5. Department of Pathology, University of Washington at Seattle, Seattle, Washington, USA

16 †joint first authors

17 \*: corresponding author: DL: [d.lusseau@abdn.ac.uk](mailto:d.lusseau@abdn.ac.uk); SEM: [s.e.mitchell@abdn.ac.uk](mailto:s.e.mitchell@abdn.ac.uk); JRS:  
18 [j.speakman@abdn.ac.uk](mailto:j.speakman@abdn.ac.uk)

19

20

## 1 **List of supplementary information**

2 Supplementary Table 1. Model selection for each individual to describe their behavioural  
3 phenotype during the baseline (BL) period. Values are  $\Delta AIC$ , the difference in AIC between  
4 the most parsimonious model (the model with the smallest AIC, hence with a  $\Delta AIC = 0$ ,  
5 highlighted in blue).  $\Delta AIC$  provides information about how much support there is to  
6 consider alternative models to the most parsimonious one. Note the large  $\Delta AIC$  for models  
7 with 2 states.

8 Supplementary Figure 1. Activity state characteristics for each treatment level at the end of  
9 the baseline period. The states are characterised by the log of the number of movements  
10 observed over a 15 minutes period and the median core body temperature of the mouse  
11 over those 15 minutes. Each colour represents a contour plot for a state (state 1 – blue,  
12 state 2 – red, state 3 - black) drawn from simulating 1000 observations for each mouse from  
13 its fitted HMM for each state. Simulated observations from all mice in a treatment level are  
14 cumulated in each contour plot. Note the high consistency within state between mice  
15 leading to well defined contours for each state.

16 Supplementary Table 2. Model selection for each individual to describe their behavioural  
17 phenotype during CR treatment. Values are  $\Delta AIC$ , the difference in AIC between the most  
18 parsimonious model (the model with the smallest AIC, hence with a  $\Delta AIC = 0$ , highlighted in  
19 blue).  $\Delta AIC$  provides information about how much support there is to consider alternative  
20 models to the most parsimonious one. Note the large  $\Delta AIC$  for models with 2 states.

21 Supplementary Figure 2. Sample quantile-theoretical quantile plots for the final model of  
22 each mouse. Quantiles are derived from the standardised pseudo-residuals and expected to  
23 follow a normal distribution (solid line).

24 Supplementary Figure 3. Activity budget of mice throughout the CR treatment derived from  
25 the Viterbi sequence estimated from the posterior probabilities of activity state estimated  
26 by the best model for each 15-min interval for each mouse. Activity budgets are presented  
27 for the light and dark phases given the known diurnal cycle in mice activity. Note that the  
28 observed differences between these two phases were not explicitly incorporated in the  
29 model structure (Table 1) but instead emerge from the model fit.

30

Supplementary Table 1. Model selection for each individual to describe their behavioural phenotype during the baseline (BL) period. Values are  $\Delta$ AIC, the difference in AIC between the most parsimonious model (the model with the smallest AIC, hence with a  $\Delta$ AIC =0, highlighted in blue).  $\Delta$ AIC provides information about how much support there is to consider alternative models to the most parsimonious one. Note the large  $\Delta$ AIC for models with 2 states.

| model   | model class | treatment parameters | 24AL       | 24AL       | 24AL       | 24AL       | 24AL       | 24AL       | 24AL       |
|---------|-------------|----------------------|------------|------------|------------|------------|------------|------------|------------|
|         |             |                      | 1          | 11         | 12         | 15         | 22         | 40         | 42         |
| HMM2.1  | HMM1        | 11                   | 542.8      | 710.8      | 528.8      | 342.8      | 885.6      | 538.0      | 422.9      |
| HMM2.2  | HMM2        | 13                   | 546.5      | 711.9      | 530.2      | 343.6      | 886.5      | 531.2      | 421.4      |
| HMM2.3  | HMM2        | 13                   | 535.7      | 701.2      | 526.9      | 331.9      | 862.5      | 539.0      | 406.8      |
| HMM2.4  | HMM2        | 15                   | 539.2      | 702.7      | 1565.2     | 333.1      | 864.2      | 1208.3     | 407.4      |
| HMM2.5  | HMM3        | 13                   | 544.5      | 711.4      | 531.4      | 345.6      | 881.3      | 538.8      | 418.1      |
| HMM2.6  | HMM3        | 13                   | 532.9      | 714.0      | 517.6      | 337.6      | 869.4      | 540.8      | 392.6      |
| HMM2.7  | HMM3        | 15                   | 531.8      | 1164.4     | 1234.5     | 340.8      | 866.2      | 536.6      | 389.3      |
| HMM2.8  | HMM4        | 13                   | 545.4      | 713.6      | 531.4      | 346.8      | 889.5      | 541.5      | 425.1      |
| HMM2.9  | HMM5        | 13                   | 543.7      | 713.0      | 531.0      | 346.8      | 889.2      | 540.4      | 424.2      |
| HMM2.10 | HMM2+4      | 15                   | 549.1      | 715.3      | 532.8      | 347.6      | 890.4      | 534.9      | 423.2      |
| HMM2.11 | HMM2+4      | 15                   | 538.4      | 355.2      | 611.3      | 918.4      | 517.3      | 569.8      | 782.7      |
| HMM2.12 | HMM2+4      | 17                   | 987.3      | 357.0      | 611.0      | 917.2      | 518.4      | 571.0      | 784.4      |
| HMM2.13 | HMM3+5      | 15                   | 547.5      | 713.7      | 532.5      | 347.5      | 890.1      | 533.8      | 422.8      |
| HMM2.14 | HMM3+5      | 15                   | 533.6      | 349.2      | 614.2      | 926.4      | 507.7      | 575.4      | 789.4      |
| HMM2.15 | HMM3+5      | 17                   | 532.4      | 352.5      | 610.2      | 925.2      | 510.3      | 578.6      | 786.3      |
| HMM3.1  | HMM1        | 20                   | 7.3        | 297.3      | 4.5        | 6.6        | 465.4      | 14.0       | 26.4       |
| HMM3.2  | HMM2        | 23                   | 12.5       | 299.8      | 3.1        | 3.3        | 455.8      | 6.5        | 19.4       |
| HMM3.3  | HMM2        | 23                   | 4.2        | 288.4      | 6.3        | <b>0.0</b> | 428.3      | 7.6        | 20.9       |
| HMM3.4  | HMM2        | 26                   | 8.0        | 289.5      | 278.9      | 3.5        | 432.8      | <b>0.0</b> | 12.5       |
| HMM3.5  | HMM3        | 23                   | 12.8       | 296.1      | 2.8        | 6.0        | 462.3      | 11.7       | 19.8       |
| HMM3.6  | HMM3        | 23                   | <b>0.0</b> | 297.7      | 5.9        | 3.1        | 441.2      | 6.6        | 8.2        |
| HMM3.7  | HMM3        | 26                   | 3.9        | 294.4      | <b>0.0</b> | 16.4       | 438.8      | 3.4        | <b>0.0</b> |
| HMM3.8  | HMM4        | 26                   | 12.8       | 304.9      | 12.8       | 9.5        | 474.2      | 24.5       | 36.0       |
| HMM3.9  | HMM5        | 26                   | 12.3       | 306.9      | 11.8       | 13.1       | 459.8      | 24.7       | 32.0       |
| HMM3.10 | HMM2+4      | 29                   | 16.0       | 307.6      | 11.4       | 6.6        | 465.1      | 17.3       | 28.6       |
| HMM3.11 | HMM2+4      | 29                   | 14.9       | 18.1       | 167.0      | 507.7      | 2.1        | 240.7      | 354.5      |
| HMM3.12 | HMM2+4      | 32                   | 17.4       | 17.7       | 168.5      | 508.8      | <b>0.0</b> | 244.3      | 365.4      |
| HMM3.13 | HMM3+5      | 29                   | 19.8       | 305.4      | 10.2       | 15.6       | 458.1      | 22.5       | 31.0       |
| HMM3.14 | HMM3+5      | 29                   | 4.2        | <b>0.0</b> | 181.2      | 518.7      | 2.3        | 244.8      | 376.6      |
| HMM3.15 | HMM3+5      | 32                   | 7.3        | 18.6       | 225.6      | 733.1      | 134.9      | 249.8      | 362.7      |

| model   | model class | treatment<br>parameters | 12AL       | 12AL       | 12AL       | 12AL       | 12AL       | 12AL       | 12AL       | 12AL       |
|---------|-------------|-------------------------|------------|------------|------------|------------|------------|------------|------------|------------|
|         |             |                         | 16         | 17         | 18         | 20         | 31         | 32         | 38         | 45         |
| HMM2.1  | HMM1        | 11                      | 1095       | 858        | 556        | 520        | 577        | 688        | 796        | 475        |
| HMM2.2  | HMM2        | 13                      | 1099       | 857        | 558        | 522        | 582        | 691        | 650        | 474        |
| HMM2.3  | HMM2        | 13                      | 1097       | 841        | 559        | 516        | 561        | 686        | 789        | 472        |
| HMM2.4  | HMM2        | 15                      | 1100       | 1410       | 561        | 519        | 1091       | 690        | 760        | 470        |
| HMM2.5  | HMM3        | 13                      | 1098       | 858        | 560        | 521        | 584        | 690        | 794        | 478        |
| HMM2.6  | HMM3        | 13                      | 1099       | 850        | 559        | 505        | 561        | 686        | 769        | 468        |
| HMM2.7  | HMM3        | 15                      | 1101       | 1554       | 563        | 504        | 1103       | 688        | 622        | 471        |
| HMM2.8  | HMM4        | 13                      | 1099       | 858        | 556        | 523        | 579        | 690        | 799        | 479        |
| HMM2.9  | HMM5        | 13                      | 1099       | 861        | 560        | 523        | 579        | 691        | 797        | 478        |
| HMM2.10 | HMM2+4      | 15                      | 1103       | 858        | 558        | 526        | 583        | 693        | 650        | 478        |
| HMM2.11 | HMM2+4      | 15                      | 532        | 406        | 641        | 600        | 586        | 510        | 1004       | 870        |
| HMM2.12 | HMM2+4      | 17                      | 522        | 406        | 1272       | 1170       | 1230       | 513        | 1005       | 873        |
| HMM2.13 | HMM3+5      | 15                      | 1103       | 860        | 561        | 526        | 584        | 694        | 652        | 477        |
| HMM2.14 | HMM3+5      | 15                      | 532        | 390        | 642        | 611        | 590        | 499        | 1003       | 871        |
| HMM2.15 | HMM3+5      | 17                      | 1095       | 387        | 645        | 611        | 593        | 497        | 1006       | 872        |
| HMM3.1  | HMM1        | 20                      | 549        | 501.4      | 17.4       | 35.5       | 50.4       | 177.6      | 9.5        | 8.9        |
| HMM3.2  | HMM2        | 23                      | 548        | 506.9      | 14.7       | 41.4       | 53.3       | 181.1      | 4.2        | 7.3        |
| HMM3.3  | HMM2        | 23                      | 548        | 470.6      | 2.5        | 21.8       | 5.1        | 178.5      | 1.6        | <b>0.0</b> |
| HMM3.4  | HMM2        | 26                      | 548        | 465.0      | <b>0.0</b> | 334.0      | <b>0.0</b> | 382.6      | 294.9      | 0.2        |
| HMM3.5  | HMM3        | 23                      | 544        | 507.1      | 18.0       | 33.5       | 54.4       | 178.6      | 2.7        | 13.0       |
| HMM3.6  | HMM3        | 23                      | 551        | 483.9      | 17.7       | <b>0.0</b> | 18.9       | 145.8      | 13.6       | 3.6        |
| HMM3.7  | HMM3        | 26                      | 1038       | 485.3      | 21.1       | 244.4      | 24.5       | 149.7      | 6.8        | 5.7        |
| HMM3.8  | HMM4        | 26                      | 555        | 508.7      | 21.2       | 47.0       | 62.0       | 187.2      | 13.4       | 15.9       |
| HMM3.9  | HMM5        | 26                      | 555        | 503.2      | 26.2       | 47.1       | 56.6       | 186.0      | 7.2        | 18.1       |
| HMM3.10 | HMM2+4      | 29                      | 555        | 514.3      | 22.1       | 52.9       | 62.5       | 190.5      | 8.4        | 13.5       |
| HMM3.11 | HMM2+4      | 29                      | 7.3        | 27.7       | 99.1       | 236.6      | 36.4       | 23.4       | 455.6      | 369.5      |
| HMM3.12 | HMM2+4      | 32                      | <b>0.0</b> | 17.2       | 101.3      | 229.4      | 359.2      | 28.7       | 718.2      | 509.7      |
| HMM3.13 | HMM3+5      | 29                      | 555.3      | 509.0      | 22.1       | 45.0       | 61.4       | 186.6      | <b>0.0</b> | 22.0       |
| HMM3.14 | HMM3+5      | 29                      | 6.0        | 9.6        | 102.2      | 246.9      | 52.6       | <b>0.0</b> | 467.7      | 331.1      |
| HMM3.15 | HMM3+5      | 32                      | 2.1        | <b>0.0</b> | 98.0       | 249.6      | 51.7       | 368.4      | 473.3      | 333.7      |

|         |             | treatment  | 10CR  | 10CR  | 10CR  | 10CR  | 10CR  | 10CR  | 10CR  | 10CR   |
|---------|-------------|------------|-------|-------|-------|-------|-------|-------|-------|--------|
| model   | model class | parameters | 8     | 9     | 21    | 33    | 46    | 50    | 54    | 56     |
| HMM2.1  | HMM1        | 11         | 975   | 862   | 544   | 445   | 442   | 316   | 695   | 714.0  |
| HMM2.2  | HMM2        | 13         | 971   | 866   | 542   | 446   | 444   | 315   | 697   | 711.3  |
| HMM2.3  | HMM2        | 13         | 965   | 861   | 547   | 375   | 442   | 300   | 693   | 697.2  |
| HMM2.4  | HMM2        | 15         | 961   | 864   | 545   | 375   | 445   | 300   | 695   | 1226.7 |
| HMM2.5  | HMM3        | 13         | 974   | 865   | 545   | 442   | 438   | 320   | 688   | 714.8  |
| HMM2.6  | HMM3        | 13         | 959   | 862   | 547   | 415   | 438   | 319   | 697   | 710.6  |
| HMM2.7  | HMM3        | 15         | 958   | 864   | 547   | 416   | 434   | 671   | 687   | 983.0  |
| HMM2.8  | HMM4        | 13         | 979   | 865   | 545   | 448   | 445   | 319   | 699   | 716.5  |
| HMM2.9  | HMM5        | 13         | 979   | 866   | 548   | 448   | 445   | 320   | 699   | 716.9  |
| HMM2.10 | HMM2+4      | 15         | 974   | 869   | 542   | 450   | 448   | 318   | 701   | 712.9  |
| HMM2.11 | HMM2+4      | 15         | 785   | 466   | 393   | 726   | 1146  | 711   | 436   | 287.4  |
| HMM2.12 | HMM2+4      | 17         | 756   | 454   | 927   | 729   | 1144  | 711   | 439   | 288.2  |
| HMM2.13 | HMM3+5      | 15         | 975   | 869   | 546   | 450   | 448   | 319   | 700   | 714.2  |
| HMM2.14 | HMM3+5      | 15         | 764   | 462   | 387   | 728   | 1149  | 750   | 432   | 308.1  |
| HMM2.15 | HMM3+5      | 17         | 618   | 774   | 385   | 1100  | 1150  | 751   | 428   | 312.0  |
| HMM3.1  | HMM1        | 20         | 582.4 | 358.5 | 150.0 | 98.4  | 8.5   | 131.2 | 271.2 | 182.3  |
| HMM3.2  | HMM2        | 23         | 574.1 | 366.0 | 134.4 | 103.3 | 13.5  | 14.0  | 272.5 | 184.1  |
| HMM3.3  | HMM2        | 23         | 587.9 | 358.2 | 149.3 | 0.0   | 6.4   | 0.0   | 262.8 | 153.6  |
| HMM3.4  | HMM2        | 26         | 564.3 | 359.1 | 130.3 | 3.5   | 10.1  | 197.8 | 510.8 | 152.8  |
| HMM3.5  | HMM3        | 23         | 585.7 | 360.5 | 151.5 | 86.1  | 11.0  | 136.8 | 261.9 | 176.0  |
| HMM3.6  | HMM3        | 23         | 565.1 | 353.3 | 329.9 | 58.0  | 0.0   | 124.0 | 269.8 | 176.3  |
| HMM3.7  | HMM3        | 26         | 566.2 | 538.4 | 154.8 | 376.0 | 242.3 | 256.9 | 262.2 | 170.9  |
| HMM3.8  | HMM4        | 26         | 589.0 | 375.9 | 146.2 | 104.8 | 19.9  | 19.4  | 280.4 | 192.6  |
| HMM3.9  | HMM5        | 26         | 592.8 | 370.1 | 160.1 | 117.9 | 18.1  | 16.7  | 282.0 | 191.7  |
| HMM3.10 | HMM2+4      | 29         | 581.7 | 372.4 | 142.1 | 118.2 | 24.9  | 24.1  | 281.2 | 194.2  |
| HMM3.11 | HMM2+4      | 29         | 0.0   | 0.0   | 28.2  | 232.0 | 748.3 | 338.1 | 38.1  | 122.9  |
| HMM3.12 | HMM2+4      | 32         | 479.2 | 287.6 | 7.1   | 235.9 | 734.8 | 341.2 | 12.4  | 0.0    |
| HMM3.13 | HMM3+5      | 29         | 596.2 | 377.0 | 161.8 | 96.6  | 20.7  | 19.0  | 272.6 | 185.8  |
| HMM3.14 | HMM3+5      | 29         | 4.8   | 4.1   | 0.0   | 230.5 | 759.9 | 396.3 | 0.0   | 6.7    |
| HMM3.15 | HMM3+5      | 32         | 17.4  | 3.8   | 1.4   | 350.4 | 761.8 | 529.7 | 257.3 | 9.3    |

|         |             | treatment  | 20CR       | 20CR       | 20CR       | 20CR       | 20CR       | 20CR       | 20CR       | 20CR       |
|---------|-------------|------------|------------|------------|------------|------------|------------|------------|------------|------------|
| model   | model class | parameters | 4          | 10         | 27         | 37         | 39         | 47         | 57         | 64         |
| HMM2.1  | HMM1        | 11         | 812.7      | 739.7      | 620.1      | 293.0      | 508.9      | 560.4      | 645.1      | 434.1      |
| HMM2.2  | HMM2        | 13         | 814.2      | 735.1      | 623.7      | 276.0      | 512.0      | 563.5      | 645.0      | 432.5      |
| HMM2.3  | HMM2        | 13         | 813.9      | 733.7      | 623.9      | 281.5      | 512.4      | 563.5      | 646.1      | 432.5      |
| HMM2.4  | HMM2        | 15         | 815.1      | 731.0      | 1071       | 268.5      | 515.5      | 566.6      | 646.8      | 430.1      |
| HMM2.5  | HMM3        | 13         | 815.8      | 743.0      | 620.3      | 296.8      | 508.8      | 559.8      | 627.6      | 434.3      |
| HMM2.6  | HMM3        | 13         | 806.6      | 738.3      | 620.1      | 291.4      | 509.4      | 563.2      | 636.2      | 436.4      |
| HMM2.7  | HMM3        | 15         | 808.9      | 741.8      | 621.4      | 295.2      | 509.4      | 560.8      | 611.8      | 436.8      |
| HMM2.8  | HMM4        | 13         | 816.0      | 738.8      | 623.6      | 296.1      | 512.9      | 564.3      | 648.8      | 436.6      |
| HMM2.9  | HMM5        | 13         | 813.2      | 742.7      | 623.4      | 295.3      | 511.9      | 563.7      | 648.5      | 438.0      |
| HMM2.10 | HMM2+4      | 15         | 817.0      | 735.3      | 627.2      | 279.2      | 516.0      | 567.4      | 648.8      | 435.0      |
| HMM2.11 | HMM2+4      | 15         | 425.1      | 537.3      | 468.4      | 903.0      | 995.9      | 275.0      | 507.6      | 622.9      |
| HMM2.12 | HMM2+4      | 17         | 426.9      | 517.6      | 468.8      | 901.2      | 999.4      | 262.2      | 510.7      | 625.9      |
| HMM2.13 | HMM3+5      | 15         | 814.5      | 738.2      | 627.1      | 278.3      | 515.0      | 566.8      | 648.3      | 436.4      |
| HMM2.14 | HMM3+5      | 15         | 428.6      | 551.2      | 457.8      | 912.6      | 991.9      | 284.2      | 503.6      | 621.7      |
| HMM2.15 | HMM3+5      | 17         | 418.0      | 550.2      | 459.6      | 916.2      | 993.2      | 288.0      | 627.9      | 619.0      |
| HMM3.1  | HMM1        | 20         | 342.7      | 285.6      | 281.4      | 36.5       | 16.8       | 47.1       | 341.4      | <b>0.0</b> |
| HMM3.2  | HMM2        | 23         | 339.4      | 270.5      | 285.9      | <b>0.0</b> | 20.3       | 45.1       | 342.1      | 2.5        |
| HMM3.3  | HMM2        | 23         | 345.6      | 279.8      | 277.7      | 39.4       | 16.4       | 49.3       | 345.8      | 0.5        |
| HMM3.4  | HMM2        | 26         | 340.6      | 257.4      | 280.2      | 40.3       | 246.2      | 50.6       | 342.1      | 283.6      |
| HMM3.5  | HMM3        | 23         | 343.1      | 289.4      | 283.6      | 40.5       | 13.7       | 47.8       | 336.1      | 0.4        |
| HMM3.6  | HMM3        | 23         | 337.1      | 285.7      | 271.2      | 35.2       | 6.8        | 48.6       | 308.9      | 5.3        |
| HMM3.7  | HMM3        | 26         | 728.2      | 278.8      | 275.0      | 182.0      | <b>0.0</b> | 47.7       | 436.5      | 4.8        |
| HMM3.8  | HMM4        | 26         | 349.8      | 289.8      | 292.6      | 44.7       | 23.0       | 54.5       | 352.0      | 8.4        |
| HMM3.9  | HMM5        | 26         | 350.7      | 295.9      | 291.5      | 45.4       | 18.3       | 55.7       | 357.2      | 14.9       |
| HMM3.10 | HMM2+4      | 29         | 347.4      | 277.1      | 297.0      | 6.3        | 26.8       | 54.2       | 365.3      | 10.6       |
| HMM3.11 | HMM2+4      | 29         | <b>0.0</b> | 1.0        | 7.9        | 457.0      | 657.1      | 35.3       | 14.4       | 111.9      |
| HMM3.12 | HMM2+4      | 32         | 1.4        | <b>0.0</b> | 1.2        | 677.3      | 791.6      | <b>0.0</b> | 24.6       | 112.6      |
| HMM3.13 | HMM3+5      | 29         | 357.5      | 300.0      | 293.4      | 48.2       | 15.9       | 57.8       | 347.3      | 10.1       |
| HMM3.14 | HMM3+5      | 29         | 8.2        | 23.5       | <b>0.0</b> | 471.0      | 649.9      | 33.2       | <b>0.0</b> | 112.3      |
| HMM3.15 | HMM3+5      | 32         | 1.0        | 616.9      | 7.9        | 461.3      | 773.0      | 49.8       | 70.6       | 113.2      |

| model   | model class | treatment<br>parameters | 30CR       | 30CR       | 30CR       | 30CR       | 30CR       | 30CR       | 30CR       |
|---------|-------------|-------------------------|------------|------------|------------|------------|------------|------------|------------|
|         |             |                         | 6          | 24         | 36         | 49         | 52         | 53         | 63         |
| HMM2.1  | HMM1        | 11                      | 665.5      | 973.5      | 323.5      | 327.8      | 358.8      | 458.1      | 396.2      |
| HMM2.2  | HMM2        | 13                      | 654.8      | 973.9      | 311.3      | 330.4      | 362.7      | 455.3      | 393.4      |
| HMM2.3  | HMM2        | 13                      | 664.7      | 968.2      | 318.2      | 318.2      | 349.2      | 461.5      | 398.0      |
| HMM2.4  | HMM2        | 15                      | 649.3      | 968.7      | 614.4      | 321.6      | 351.3      | 459.0      | 395.4      |
| HMM2.5  | HMM3        | 13                      | 655.1      | 974.2      | 306.9      | 330.6      | 360.2      | 450.4      | 399.5      |
| HMM2.6  | HMM3        | 13                      | 661.6      | 971.3      | 327.4      | 307.5      | 358.8      | 460.7      | 389.3      |
| HMM2.7  | HMM3        | 15                      | 650.7      | 1600       | 590.2      | 306.0      | 359.7      | 454.3      | 392.9      |
| HMM2.8  | HMM4        | 13                      | 668.0      | 971.6      | 325.9      | 330.9      | 357.9      | 461.4      | 399.9      |
| HMM2.9  | HMM5        | 13                      | 669.1      | 975.5      | 327.3      | 331.5      | 362.8      | 461.2      | 397.7      |
| HMM2.10 | HMM2+4      | 15                      | 657.3      | 972.6      | 313.6      | 333.5      | 361.6      | 458.4      | 397.2      |
| HMM2.11 | HMM2+4      | 15                      | 330.9      | 426.8      | 781.3      | 770.7      | 406.1      | 312.9      | 443.3      |
| HMM2.12 | HMM2+4      | 17                      | 815.1      | 424.6      | 765.8      | 771.9      | 390.4      | 316.3      | 446.3      |
| HMM2.13 | HMM3+5      | 15                      | 658.6      | 976.1      | 315.2      | 333.9      | 366.6      | 458.6      | 394.8      |
| HMM2.14 | HMM3+5      | 15                      | 320.7      | 432.2      | 779.5      | 778.2      | 416.0      | 302.6      | 456.7      |
| HMM2.15 | HMM3+5      | 17                      | 296.5      | 432.5      | 768.7      | 778.6      | 396.8      | 300.5      | 457.6      |
| HMM3.1  | HMM1        | 20                      | 186.5      | 369.4      | 29.9       | 60.0       | 10.1       | 67.7       | 27.7       |
| HMM3.2  | HMM2        | 23                      | 169.5      | 365.8      | 14.9       | 11.1       | 11.9       | 56.5       | 28.4       |
| HMM3.3  | HMM2        | 23                      | 181.0      | 361.8      | <b>0.0</b> | 62.6       | <b>0.0</b> | 57.8       | 31.9       |
| HMM3.4  | HMM2        | 26                      | 158.5      | 348.3      | 143.5      | 74.5       | 193.6      | 64.7       | 218.9      |
| HMM3.5  | HMM3        | 23                      | 184.5      | 368.6      | 7.1        | 65.8       | 2.7        | 50.8       | 21.1       |
| HMM3.6  | HMM3        | 23                      | 184.1      | 364.5      | 27.3       | <b>0.0</b> | 11.7       | 66.9       | <b>0.0</b> |
| HMM3.7  | HMM3        | 26                      | 184.1      | 628.4      | 184.6      | 2.6        | 196.6      | 48.9       | 3.6        |
| HMM3.8  | HMM4        | 26                      | 196.1      | 380.3      | 41.0       | 19.9       | 15.0       | 76.8       | 36.1       |
| HMM3.9  | HMM5        | 26                      | 193.3      | 385.0      | 37.6       | 68.0       | 11.8       | 66.9       | 32.1       |
| HMM3.10 | HMM2+4      | 29                      | 181.8      | 377.4      | 23.7       | 18.2       | 16.7       | 63.9       | 37.1       |
| HMM3.11 | HMM2+4      | 29                      | 37.0       | <b>0.0</b> | 303.5      | 177.6      | 95.2       | 6.8        | 100.6      |
| HMM3.12 | HMM2+4      | 32                      | 185.8      | 2.1        | 281.3      | 164.0      | 134.0      | <b>0.0</b> | 348.2      |
| HMM3.13 | HMM3+5      | 29                      | 194.1      | 383.2      | 14.1       | 73.7       | 4.1        | 57.9       | 24.8       |
| HMM3.14 | HMM3+5      | 29                      | <b>0.0</b> | 277.8      | 307.4      | 178.9      | 119.2      | 51.5       | 107.1      |
| HMM3.15 | HMM3+5      | 32                      | 97.5       | 12.2       | 569.8      | 181.3      | 263.4      | 56.9       | 105.2      |

| model   | model class | treatment parameters | 40CR       | 40CR       | 40CR       | 40CR       | 40CR       | 40CR       | 40CR       | 40CR       |
|---------|-------------|----------------------|------------|------------|------------|------------|------------|------------|------------|------------|
|         |             |                      | 7          | 28         | 30         | 34         | 44         | 48         | 58         | 62         |
| HMM2.1  | HMM1        | 11                   | 639.2      | 913.1      | 461.8      | 415.8      | 471.1      | 358.4      | 402.4      | 536.1      |
| HMM2.2  | HMM2        | 13                   | 617.7      | 915.1      | 462.3      | 414.9      | 471.1      | 356.0      | 404.8      | 539.6      |
| HMM2.3  | HMM2        | 13                   | 634.4      | 908.0      | 439.7      | 414.9      | 447.3      | 357.5      | 403.1      | 527.3      |
| HMM2.4  | HMM2        | 15                   | 610.0      | 1394       | 432.9      | 411.8      | 436.9      | 356.3      | 404.8      | 831.7      |
| HMM2.5  | HMM3        | 13                   | 639.2      | 912.9      | 459.1      | 419.4      | 474.7      | 360.9      | 404.0      | 534.9      |
| HMM2.6  | HMM3        | 13                   | 632.2      | 912.8      | 461.8      | 418.0      | 472.1      | 354.4      | 396.6      | 530.3      |
| HMM2.7  | HMM3        | 15                   | 628.1      | 912.0      | 451.3      | 741.7      | 473.2      | 356.6      | 399.9      | 526.2      |
| HMM2.8  | HMM4        | 13                   | 643.1      | 916.8      | 462.2      | 417.7      | 475.1      | 362.2      | 405.5      | 539.1      |
| HMM2.9  | HMM5        | 13                   | 642.7      | 915.6      | 462.5      | 418.6      | 474.1      | 360.8      | 406.0      | 539.3      |
| HMM2.10 | HMM2+4      | 15                   | 621.3      | 918.8      | 462.4      | 415.8      | 474.4      | 359.8      | 408.0      | 542.7      |
| HMM2.11 | HMM2+4      | 15                   | 409.0      | 397.2      | 567.5      | 708.0      | 509.7      | 691.5      | 440.6      | 330.4      |
| HMM2.12 | HMM2+4      | 17                   | 406.1      | 394.6      | 542.6      | 710.1      | 503.2      | 1071       | 861.8      | 764.5      |
| HMM2.13 | HMM3+5      | 15                   | 621.4      | 917.6      | 462.4      | 417.8      | 474.5      | 358.4      | 408.4      | 542.9      |
| HMM2.14 | HMM3+5      | 15                   | 408.0      | 386.8      | 564.8      | 711.3      | 529.0      | 695.7      | 465.1      | 325.6      |
| HMM2.15 | HMM3+5      | 17                   | 402.4      | 756.9      | 560.4      | 710.6      | 520.3      | 698.4      | 582.9      | 327.9      |
| HMM3.1  | HMM1        | 20                   | 103.8      | 398.1      | 29.6       | 15.1       | 22.8       | 42.6       | 62.9       | 87.5       |
| HMM3.2  | HMM2        | 23                   | 61.0       | 393.5      | 33.1       | 0.6        | 24.3       | 45.7       | 67.1       | 90.1       |
| HMM3.3  | HMM2        | 23                   | 97.3       | 384.4      | 19.1       | 14.0       | <b>0.0</b> | 28.7       | 59.1       | 75.1       |
| HMM3.4  | HMM2        | 26                   | 51.7       | 692.3      | 268.9      | 279.7      | 1.4        | <b>0.0</b> | 259.7      | 346.3      |
| HMM3.5  | HMM3        | 23                   | 105.6      | 390.9      | 33.2       | 17.6       | 28.2       | 47.5       | 68.0       | 89.2       |
| HMM3.6  | HMM3        | 23                   | 105.5      | 374.0      | 19.1       | 15.8       | 23.8       | 13.1       | 41.7       | 90.5       |
| HMM3.7  | HMM3        | 26                   | 106.7      | 363.3      | 34.4       | 22.6       | 210.9      | 42.4       | 45.9       | 192.6      |
| HMM3.8  | HMM4        | 26                   | 113.2      | 406.6      | 34.5       | 15.5       | 33.3       | 20.7       | 72.9       | 98.8       |
| HMM3.9  | HMM5        | 26                   | 112.7      | 399.0      | 38.0       | 25.3       | 32.6       | 50.4       | 70.5       | 97.8       |
| HMM3.10 | HMM2+4      | 29                   | 71.2       | 402.8      | 37.9       | <b>0.0</b> | 34.7       | 54.3       | 77.2       | 101.0      |
| HMM3.11 | HMM2+4      | 29                   | 22.7       | 35.8       | 36.6       | 188.7      | 91.7       | 288.2      | <b>0.0</b> | 4.4        |
| HMM3.12 | HMM2+4      | 32                   | 17.2       | 46.0       | <b>0.0</b> | 186.9      | 90.5       | 276.4      | 1.7        | 207.1      |
| HMM3.13 | HMM3+5      | 29                   | 113.4      | 391.7      | 41.7       | 27.8       | 37.8       | 24.6       | 82.8       | 99.4       |
| HMM3.14 | HMM3+5      | 29                   | 21.5       | <b>0.0</b> | 44.0       | 169.8      | 95.0       | 300.7      | 24.0       | 21.0       |
| HMM3.15 | HMM3+5      | 32                   | <b>0.0</b> | 3.4        | 45.3       | 158.7      | 97.1       | 302.1      | 29.2       | <b>0.0</b> |



Supplementary Figure 1. Activity state characteristics for each treatment level at the end of the baseline period. The states are characterised by the log of the number of movements observed over a 15 minutes period and the median core body temperature of the mouse over those 15 minutes. Each colour represents a contour plot for a state (state 1 – blue, state 2 – red, state 3 - black) drawn from simulating 1000 observations for each mouse from its fitted HMM for each state. Simulated observations from all mice in a treatment level are cumulated in each contour plot. Note the high consistency within state between mice leading to well defined contours for each state.

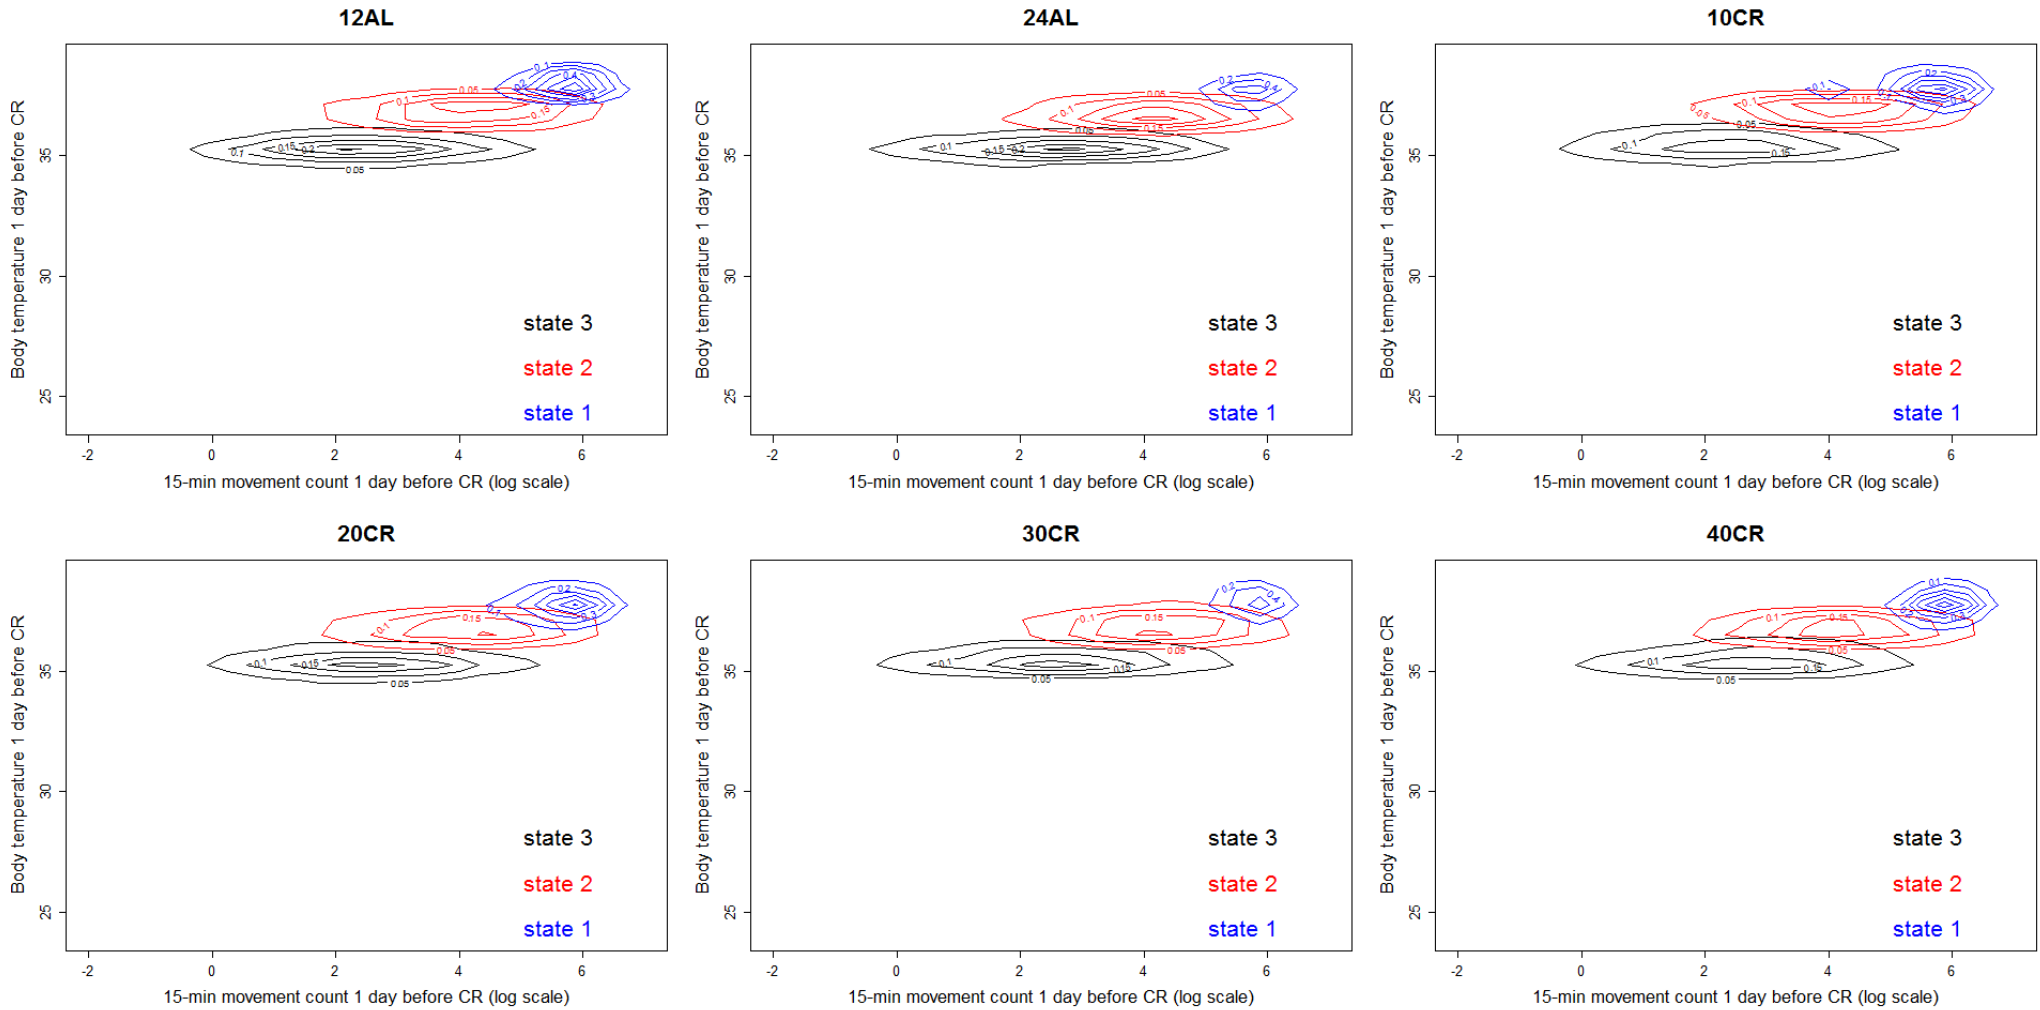

Supplementary Table 2. Model selection for each individual to describe their behavioural phenotype during CR treatment. Values are  $\Delta$ AIC, the difference in AIC between the most parsimonious model (the model with the smallest AIC, hence with a  $\Delta$ AIC =0, highlighted in blue).  $\Delta$ AIC provides information about how much support there is to consider alternative models to the most parsimonious one. Note the large  $\Delta$ AIC for models with 2 states.

| model   | model class | treatment parameters | 24AL       | 24AL       | 24AL       | 24AL       | 24AL       | 24AL       | 24AL       | 24AL       |
|---------|-------------|----------------------|------------|------------|------------|------------|------------|------------|------------|------------|
|         |             |                      | 1          | 11         | 12         | 13         | 15         | 22         | 40         | 42         |
| HMM2.1  | HMM1        | 11                   | 4015.5     | 2639.5     | 4970.1     | 7512.2     | 3361.0     | 3651.2     | 3227.8     | 3207.0     |
| HMM2.2  | HMM2        | 13                   | 4005.5     | 2631.7     | 4961.0     | 7511.9     | 3313.6     | 3620.3     | 3205.4     | 3196.5     |
| HMM2.3  | HMM2        | 13                   | 3771.5     | 2498.4     | 4912.6     | 7361.0     | 2970.3     | 3465.8     | 3100.5     | 3119.2     |
| HMM2.4  | HMM2        | 15                   | 3758.2     | 2495.9     | 4903.0     | 7347.4     | 2914.0     | 3430.1     | 3041.1     | 3109.6     |
| HMM2.5  | HMM3        | 13                   | 4010.2     | 2633.9     | 4962.5     | 7494.3     | 3305.5     | 3629.6     | 3223.3     | 3201.7     |
| HMM2.6  | HMM3        | 13                   | 3974.3     | 2513.6     | 4933.0     | 6891.7     | 3133.8     | 3492.3     | 3219.8     | 3095.4     |
| HMM2.7  | HMM3        | 15                   | 3972.1     | 2509.9     | 4929.1     | 6848.6     | 3095.3     | 3472.8     | 3214.1     | 3090.0     |
| HMM2.8  | HMM4        | 13                   | 3975.7     | 2629.6     | 4971.5     | 7512.9     | 3328.9     | 3624.2     | 3201.2     | 3174.9     |
| HMM2.9  | HMM5        | 13                   | 3971.7     | 2628.1     | 4970.3     | 7511.9     | 3328.6     | 3614.8     | 3211.3     | 3174.2     |
| HMM2.10 | HMM2+4      | 15                   | 3968.0     | 2622.1     | 4963.1     | 7513.8     | 3284.3     | 3599.1     | 3183.6     | 3166.5     |
| HMM2.11 | HMM2+4      | 15                   | 3727.6     | 2492.2     | 4914.6     | 7364.4     | 2947.7     | 3445.5     | 3075.4     | 3088.1     |
| HMM2.12 | HMM2+4      | 17                   | 3718.1     | 2490.8     | 4905.9     | 7351.3     | 2896.7     | 3415.6     | 3024.3     | 3080.8     |
| HMM2.13 | HMM3+5      | 15                   | 3964.3     | 2620.4     | 4961.8     | 7511.6     | 3284.1     | 3588.5     | 3191.9     | 3165.5     |
| HMM2.14 | HMM3+5      | 15                   | 3930.1     | 2508.8     | 4933.1     | 6892.5     | 3104.8     | 3459.3     | 3203.5     | 3064.2     |
| HMM2.15 | HMM3+5      | 17                   | 3930.9     | 2506.6     | 4929.9     | 6848.0     | 3070.3     | 3444.5     | 3200.2     | 3061.1     |
| HMM3.1  | HMM1        | 20                   | 379.0      | 123.4      | 57.5       | 281.3      | 462.5      | 204.5      | 148.3      | 297.7      |
| HMM3.2  | HMM2        | 23                   | 365.9      | 96.6       | 47.6       | 285.1      | 404.2      | 190.3      | 146.3      | 292.7      |
| HMM3.3  | HMM2        | 23                   | 59.0       | <b>0.0</b> | 5.3        | 3842.8     | 99.1       | 25.0       | 40.2       | 285.4      |
| HMM3.4  | HMM2        | 26                   | 43.0       | 0.2        | <b>0.0</b> | 13.0       | 34.1       | <b>0.0</b> | 21.0       | 276.4      |
| HMM3.5  | HMM3        | 23                   | 372.5      | 105.5      | 40.9       | 281.9      | 391.0      | 176.1      | 148.7      | 299.1      |
| HMM3.6  | HMM3        | 23                   | 279.9      | 24.7       | 25.0       | 33.1       | 243.4      | 58.3       | 143.4      | 248.9      |
| HMM3.7  | HMM3        | 26                   | 278.9      | 29.9       | 16.7       | 15.7       | 189.3      | 42.7       | 143.3      | 30.0       |
| HMM3.8  | HMM4        | 26                   | 344.9      | 107.0      | 60.1       | 264.0      | 421.7      | 172.6      | 127.1      | 269.8      |
| HMM3.9  | HMM5        | 26                   | 341.9      | 106.2      | 61.1       | 282.4      | 426.1      | 168.7      | 130.1      | 260.5      |
| HMM3.10 | HMM2+4      | 29                   | 331.9      | 76.3       | 50.1       | 268.3      | 356.7      | 161.0      | 126.2      | 263.7      |
| HMM3.11 | HMM2+4      | 29                   | 8.6        | 4.4        | 9.9        | 3851.9     | 60.5       | 1.8        | 15.3       | 260.2      |
| HMM3.12 | HMM2+4      | 32                   | <b>0.0</b> | 1227.3     | 5.3        | <b>0.0</b> | <b>0.0</b> | 1954.9     | <b>0.0</b> | 249.5      |
| HMM3.13 | HMM3+5      | 29                   | 335.3      | 81.0       | 44.3       | 283.8      | 359.2      | 143.1      | 131.7      | 260.2      |
| HMM3.14 | HMM3+5      | 29                   | 234.3      | 29.6       | 28.8       | 36.6       | 202.1      | 31.9       | 125.3      | 8.8        |
| HMM3.15 | HMM3+5      | 32                   | 237.4      | 34.3       | 20.8       | 20.7       | 152.3      | 20.3       | 128.0      | <b>0.0</b> |

|         |             | treatment  | 12AL       | 12AL       | 12AL       | 12AL       | 12AL       | 12AL       | 12AL       | 12AL       |
|---------|-------------|------------|------------|------------|------------|------------|------------|------------|------------|------------|
| model   | model class | parameters | 16         | 17         | 18         | 20         | 31         | 32         | 38         | 45         |
| HMM2.1  | HMM1        | 11         | 4316.5     | 3943.5     | 4482.0     | 3850.5     | 3563       | 4129       | 4019       | 4111       |
| HMM2.2  | HMM2        | 13         | 4297.7     | 3924.0     | 4363.8     | 3818.7     | 3544       | 4126       | 4012       | 4111       |
| HMM2.3  | HMM2        | 13         | 4268.5     | 3912.3     | 4277.4     | 3785.4     | 3524       | 4010       | 3975       | 4010       |
| HMM2.4  | HMM2        | 15         | 4246.6     | 3892.1     | 4153.4     | 3748.7     | 3507       | 3997       | 3967       | 7906       |
| HMM2.5  | HMM3        | 13         | 4304.2     | 3912.1     | 4410.1     | 3820.9     | 3559       | 4131       | 4010       | 4104       |
| HMM2.6  | HMM3        | 13         | 4220.8     | 3863.6     | 4222.0     | 3776.7     | 3557       | 4117       | 3849       | 4038       |
| HMM2.7  | HMM3        | 15         | 4209.4     | 3831.1     | 4151.4     | 3744.6     | 3552       | 9556       | 3839       | 4026       |
| HMM2.8  | HMM4        | 13         | 4303.1     | 3937.3     | 4470.4     | 3839.9     | 3554       | 4132       | 4001       | 4082       |
| HMM2.9  | HMM5        | 13         | 4272.5     | 3934.0     | 4463.9     | 3832.5     | 3543       | 4132       | 3974       | 4095       |
| HMM2.10 | HMM2+4      | 15         | 4285.0     | 3919.5     | 4356.0     | 3809.5     | 3537       | 4129       | 3996       | 4084       |
| HMM2.11 | HMM2+4      | 15         | 4254.5     | 3906.9     | 4266.4     | 3776.4     | 3515       | 4013       | 3959       | 3987       |
| HMM2.12 | HMM2+4      | 17         | 4233.4     | 12050      | 4146.9     | 3741.0     | 3500       | 4000       | 3953       | 7895       |
| HMM2.13 | HMM3+5      | 15         | 4254.5     | 3916.3     | 4349.1     | 3802.3     | 3527       | 4129       | 3969       | 4096       |
| HMM2.14 | HMM3+5      | 15         | 4178.5     | 3856.0     | 4204.1     | 3760.4     | 3538       | 4120       | 3807       | 4024       |
| HMM2.15 | HMM3+5      | 17         | 4169.5     | 3825.9     | 4138.3     | 11151      | 3534       | 4121       | 8699       | 4015       |
| HMM3.1  | HMM1        | 20         | 87.2       | 27.1       | 354.8      | 126.9      | 118.4      | 151.6      | 673.4      | 291.5      |
| HMM3.2  | HMM2        | 23         | 87.0       | 17.4       | 286.1      | 120.3      | 67.8       | 156.2      | 270.6      | 293.3      |
| HMM3.3  | HMM2        | 23         | 68.0       | 31.7       | 148.5      | 38.6       | 21.3       | <b>0.0</b> | 600.8      | 47.2       |
| HMM3.4  | HMM2        | 26         | 60.4       | 22.4       | 24.8       | <b>0.0</b> | 8.9        | 815.2      | 580.7      | 4.2        |
| HMM3.5  | HMM3        | 23         | 90.9       | 11.3       | 320.7      | 116.8      | 125.6      | 156.6      | 673.6      | 278.9      |
| HMM3.6  | HMM3        | 23         | 24.6       | 19.7       | 98.2       | 73.1       | 87.2       | 136.1      | 77.4       | 152.2      |
| HMM3.7  | HMM3        | 26         | 17.1       | 4.6        | 6.9        | 43.0       | 77.8       | 136.2      | 564.8      | 91.9       |
| HMM3.8  | HMM4        | 26         | 67.8       | 25.8       | 353.5      | 124.9      | 137.9      | 1212.4     | 267.8      | 286.7      |
| HMM3.9  | HMM5        | 26         | 62.2       | 21.2       | 338.9      | 125.8      | 116.0      | 158.6      | 237.2      | 288.5      |
| HMM3.10 | HMM2+4      | 29         | 70.8       | 15.7       | 270.9      | 116.9      | 71.0       | 158.8      | 671.5      | 289.7      |
| HMM3.11 | HMM2+4      | 29         | 48.3       | 29.9       | 139.2      | 50.9       | 24.6       | 4.9        | 592.5      | 45.6       |
| HMM3.12 | HMM2+4      | 32         | 2264.7     | 20.4       | <b>0.0</b> | 8.6        | <b>0.0</b> | 815.5      | 569.6      | <b>0.0</b> |
| HMM3.13 | HMM3+5      | 29         | 65.6       | 5.9        | 310.4      | 113.2      | 90.7       | 163.4      | 643.2      | 278.3      |
| HMM3.14 | HMM3+5      | 29         | <b>0.0</b> | 14.1       | 90.2       | 78.7       | 82.6       | 145.3      | 33.2       | 155.2      |
| HMM3.15 | HMM3+5      | 32         | 1.8        | <b>0.0</b> | 4.6        | 46.7       | 76.0       | 145.5      | <b>0.0</b> | 95.2       |

| model   | model class | treatment<br>parameters | 10CR       | 10CR       | 10CR       | 10CR       | 10CR       | 10CR       | 10CR       | 10CR       |
|---------|-------------|-------------------------|------------|------------|------------|------------|------------|------------|------------|------------|
|         |             |                         | 8          | 9          | 21         | 33         | 46         | 50         | 54         | 56         |
| HMM2.1  | HMM1        | 11                      | 4294       | 4350       | 4546       | 3730       | 4603       | 3893       | 3136       | 4545       |
| HMM2.2  | HMM2        | 13                      | 4263       | 4346       | 4547       | 3690       | 4591       | 3859       | 3138       | 4531       |
| HMM2.3  | HMM2        | 13                      | 4273       | 4056       | 4534       | 3597       | 4508       | 3785       | 2940       | 4455       |
| HMM2.4  | HMM2        | 15                      | 7877       | 8853       | 4535       | 9068       | 10590      | 3752       | 2940       | 4443       |
| HMM2.5  | HMM3        | 13                      | 4298       | 4353       | 4532       | 3706       | 4581       | 3873       | 3137       | 4527       |
| HMM2.6  | HMM3        | 13                      | 3853       | 3540       | 4504       | 3600       | 4584       | 3784       | 3114       | 4364       |
| HMM2.7  | HMM3        | 15                      | 3851       | 3531       | 4491       | 3576       | 4556       | 3771       | 3116       | 11063      |
| HMM2.8  | HMM4        | 13                      | 4298       | 4349       | 4523       | 3704       | 4605       | 3858       | 3115       | 4529       |
| HMM2.9  | HMM5        | 13                      | 4295       | 4350       | 4535       | 3705       | 4606       | 3897       | 3140       | 4544       |
| HMM2.10 | HMM2+4      | 15                      | 4266       | 4344       | 4524       | 3668       | 4594       | 3827       | 3118       | 4517       |
| HMM2.11 | HMM2+4      | 15                      | 4276       | 4056       | 4510       | 3573       | 4511       | 3751       | 2919       | 4438       |
| HMM2.12 | HMM2+4      | 17                      | 7879       | 8855       | 4511       | 9057       | 4488       | 3721       | 2919       | 4428       |
| HMM2.13 | HMM3+5      | 15                      | 4264       | 4346       | 4536       | 3668       | 4595       | 3862       | 3142       | 4531       |
| HMM2.14 | HMM3+5      | 15                      | 3855       | 3543       | 4493       | 3577       | 4587       | 3788       | 3118       | 4361       |
| HMM2.15 | HMM3+5      | 17                      | 3854       | 8934       | 4482       | 3556       | 4559       | 3775       | 8646       | 4353       |
| HMM3.1  | HMM1        | 20                      | 449.4      | 1648.5     | 76.5       | 165.3      | 336.6      | 163.4      | 211.3      | 219.0      |
| HMM3.2  | HMM2        | 23                      | 420.0      | 1597.2     | 67.9       | 168.4      | 285.1      | 165.8      | 192.3      | 192.4      |
| HMM3.3  | HMM2        | 23                      | 524.5      | 1188.5     | 31.5       | 81.3       | 92.7       | 153.6      | 28.0       | 136.7      |
| HMM3.4  | HMM2        | 26                      | 416.9      | 6964.0     | 9.3        | 7.4        | 19.0       | 154.5      | 23.6       | 84.4       |
| HMM3.5  | HMM3        | 23                      | 451.3      | 1580.4     | 69.7       | 155.5      | 318.2      | 142.1      | 192.2      | 198.5      |
| HMM3.6  | HMM3        | 23                      | 68.6       | 587.5      | 63.0       | 79.8       | 313.2      | 4.7        | 213.0      | 7.4        |
| HMM3.7  | HMM3        | 26                      | <b>0.0</b> | 8.0        | 51.6       | 10.5       | 293.1      | <b>0.0</b> | 168.5      | <b>0.0</b> |
| HMM3.8  | HMM4        | 26                      | 453.0      | 1641.7     | 73.3       | 139.4      | 319.5      | 125.9      | 185.3      | 213.7      |
| HMM3.9  | HMM5        | 26                      | 525.3      | 1651.0     | 73.7       | 147.4      | 340.2      | 171.0      | 211.8      | 220.7      |
| HMM3.10 | HMM2+4      | 29                      | 500.1      | 1592.4     | 62.8       | 144.0      | 266.3      | 130.0      | 172.5      | 178.6      |
| HMM3.11 | HMM2+4      | 29                      | 529.6      | 1180.1     | 26.4       | 67.8       | 71.8       | 119.5      | 11.5       | 129.3      |
| HMM3.12 | HMM2+4      | 32                      | 421.7      | 1026.1     | <b>0.0</b> | 5.0        | <b>0.0</b> | 121.8      | <b>0.0</b> | 79.7       |
| HMM3.13 | HMM3+5      | 29                      | 449.4      | 1587.2     | 66.1       | 140.9      | 322.6      | 150.1      | 199.6      | 201.1      |
| HMM3.14 | HMM3+5      | 29                      | 73.8       | 45.3       | 61.1       | 71.8       | 313.5      | 12.6       | 173.3      | 9.2        |
| HMM3.15 | HMM3+5      | 32                      | 1.1        | <b>0.0</b> | 49.0       | <b>0.0</b> | 293.8      | 1409.2     | 167.3      | 10.3       |

| model   | model class | treatment<br>parameters | 20CR       | 20CR       | 20CR       | 20CR       | 20CR       | 20CR       | 20CR       | 20CR       |
|---------|-------------|-------------------------|------------|------------|------------|------------|------------|------------|------------|------------|
|         |             |                         | 4          | 10         | 27         | 37         | 39         | 47         | 57         | 64         |
| HMM2.1  | HMM1        | 11                      | 5062       | 4360       | 4272       | 3816       | 4655       | 4170       | 3943       | 3772       |
| HMM2.2  | HMM2        | 13                      | 5009       | 4348       | 4249       | 3798       | 4652       | 4164       | 3896       | 3765       |
| HMM2.3  | HMM2        | 13                      | 4972       | 4348       | 4061       | 3572       | 4575       | 3806       | 3856       | 2926       |
| HMM2.4  | HMM2        | 15                      | 4941       | 10603      | 4048       | 3523       | 8831       | 8541       | 3796       | 8262       |
| HMM2.5  | HMM3        | 13                      | 5058       | 4358       | 4267       | 3811       | 4645       | 4167       | 3946       | 3755       |
| HMM2.6  | HMM3        | 13                      | 4965       | 4257       | 3771       | 3601       | 4348       | 3707       | 3712       | 3069       |
| HMM2.7  | HMM3        | 15                      | 4966       | 9582       | 3752       | 3577       | 4344       | 3702       | 6316       | 3058       |
| HMM2.8  | HMM4        | 13                      | 5059       | 4356       | 4274       | 3820       | 4631       | 4162       | 3942       | 3772       |
| HMM2.9  | HMM5        | 13                      | 5063       | 4360       | 4273       | 3818       | 4650       | 4166       | 3943       | 3767       |
| HMM2.10 | HMM2+4      | 15                      | 5005       | 4344       | 4250       | 3801       | 4630       | 4155       | 3897       | 3763       |
| HMM2.11 | HMM2+4      | 15                      | 4971       | 4345       | 4064       | 3576       | 4550       | 3805       | 3853       | 2924       |
| HMM2.12 | HMM2+4      | 17                      | 11611      | 4334       | 4055       | 9933       | 4548       | 3806       | 3795       | 2906       |
| HMM2.13 | HMM3+5      | 15                      | 5010       | 4348       | 4250       | 3799       | 4647       | 4160       | 3897       | 3758       |
| HMM2.14 | HMM3+5      | 15                      | 4966       | 4257       | 3774       | 3604       | 4344       | 3709       | 3712       | 3066       |
| HMM2.15 | HMM3+5      | 17                      | 4967       | 4250       | 3754       | 3579       | 4341       | 3704       | 3709       | 3055       |
| HMM3.1  | HMM1        | 20                      | 475.0      | 327.5      | 859.6      | 402.5      | 207.9      | 603.0      | 468.3      | 1113.6     |
| HMM3.2  | HMM2        | 23                      | 459.1      | 323.2      | 777.1      | 296.0      | 208.5      | 524.1      | 393.2      | 993.9      |
| HMM3.3  | HMM2        | 23                      | 11.3       | 218.1      | 494.9      | 154.4      | 192.0      | 204.6      | 343.9      | 21.7       |
| HMM3.4  | HMM2        | 26                      | 5.0        | 217.2      | 464.1      | 64.1       | 190.0      | 203.2      | 265.8      | 1459.0     |
| HMM3.5  | HMM3        | 23                      | 468.4      | 323.7      | 743.6      | 334.5      | 269.6      | 533.5      | 436.7      | 1017.8     |
| HMM3.6  | HMM3        | 23                      | 153.9      | 19.3       | 75.4       | 65.1       | 11.6       | 17.7       | 26.6       | 253.1      |
| HMM3.7  | HMM3        | 26                      | 148.3      | <b>0.0</b> | 15.3       | 6.9        | 70.6       | 21.0       | 13.3       | 242.6      |
| HMM3.8  | HMM4        | 26                      | 465.6      | 324.0      | 853.7      | 405.7      | 251.7      | 591.3      | 465.7      | 1111.8     |
| HMM3.9  | HMM5        | 26                      | 468.4      | 335.0      | 849.4      | 403.2      | 199.3      | 601.9      | 460.7      | 1105.0     |
| HMM3.10 | HMM2+4      | 29                      | 452.2      | 319.7      | 768.5      | 289.2      | 188.3      | 506.4      | 402.0      | 981.4      |
| HMM3.11 | HMM2+4      | 29                      | 4.6        | 194.8      | 477.3      | 144.3      | 219.1      | 187.2      | 351.8      | 27.1       |
| HMM3.12 | HMM2+4      | 32                      | <b>0.0</b> | 193.8      | 1870.7     | 47.6       | 207.3      | 185.7      | 275.4      | <b>0.0</b> |
| HMM3.13 | HMM3+5      | 29                      | 461.0      | 329.7      | 732.4      | 328.4      | 249.6      | 527.0      | 434.6      | 992.5      |
| HMM3.14 | HMM3+5      | 29                      | 151.5      | 22.2       | 62.2       | 64.7       | 6.2        | 7.0        | 32.5       | 247.0      |
| HMM3.15 | HMM3+5      | 32                      | 146.7      | 2.0        | <b>0.0</b> | <b>0.0</b> | <b>0.0</b> | <b>0.0</b> | <b>0.0</b> | 236.3      |

| model   | model class | treatment<br>parameters | 30CR       | 30CR       | 30CR       | 30CR       | 30CR       | 30CR       | 30CR       |
|---------|-------------|-------------------------|------------|------------|------------|------------|------------|------------|------------|
|         |             |                         | 6          | 24         | 36         | 49         | 52         | 53         | 63         |
| HMM2.1  | HMM1        | 11                      | 4957       | 4682       | 3285       | 3250       | 6490       | 4095       | 2922       |
| HMM2.2  | HMM2        | 13                      | 4955       | 4681       | 3285       | 3196       | 6490       | 4087       | 2843       |
| HMM2.3  | HMM2        | 13                      | 4368       | 4626       | 3235       | 3146       | 6036       | 3536       | 2468       |
| HMM2.4  | HMM2        | 15                      | 4353       | 4621       | 3238       | 3102       | 6004       | 3522       | 2427       |
| HMM2.5  | HMM3        | 13                      | 4953       | 4657       | 3256       | 3156       | 6492       | 4092       | 2815       |
| HMM2.6  | HMM3        | 13                      | 4259       | 4134       | 3101       | 2981       | 5743       | 3299       | 2214       |
| HMM2.7  | HMM3        | 15                      | 4225       | 4106       | 4865       | 2915       | 5705       | 3275       | 2145       |
| HMM2.8  | HMM4        | 13                      | 4949       | 4685       | 3269       | 3235       | 6478       | 4089       | 2897       |
| HMM2.9  | HMM5        | 13                      | 4957       | 4682       | 3263       | 3232       | 6487       | 4092       | 2900       |
| HMM2.10 | HMM2+4      | 15                      | 4945       | 4684       | 3268       | 3178       | 6480       | 4082       | 2788       |
| HMM2.11 | HMM2+4      | 15                      | 4356       | 4630       | 3215       | 3132       | 6035       | 3526       | 2449       |
| HMM2.12 | HMM2+4      | 17                      | 4340       | 4625       | 7576       | 3085       | 6007       | 3513       | 2400       |
| HMM2.13 | HMM3+5      | 15                      | 4955       | 4681       | 3262       | 3175       | 6487       | 4085       | 2791       |
| HMM2.14 | HMM3+5      | 15                      | 4254       | 4135       | 3080       | 2968       | 5745       | 3297       | 2204       |
| HMM2.15 | HMM3+5      | 17                      | 4217       | 4107       | 4824       | 2896       | 5708       | 7464       | 2135       |
| HMM3.1  | HMM1        | 20                      | 903.6      | 937.8      | 741.5      | 368.6      | 1125.4     | 1018.3     | 557.4      |
| HMM3.2  | HMM2        | 23                      | 874.7      | 933.5      | 739.3      | 368.4      | 1053.0     | 951.7      | 509.4      |
| HMM3.3  | HMM2        | 23                      | 191.0      | 846.2      | 508.4      | 552.6      | 638.8      | 327.9      | 149.3      |
| HMM3.4  | HMM2        | 26                      | 180.2      | 842.2      | 478.4      | 477.3      | 575.4      | 328.2      | 129.8      |
| HMM3.5  | HMM3        | 23                      | 888.9      | 914.0      | 708.8      | 391.2      | 1107.2     | 930.6      | 488.1      |
| HMM3.6  | HMM3        | 23                      | 13.0       | 39.7       | 79.0       | 417.6      | 64.8       | 13.2       | 139.3      |
| HMM3.7  | HMM3        | 26                      | <b>0.0</b> | <b>0.0</b> | <b>0.0</b> | 300.8      | 30.4       | 5.6        | 111.9      |
| HMM3.8  | HMM4        | 26                      | 876.8      | 946.3      | 510.0      | 463.5      | 1116.2     | 1013.3     | 490.7      |
| HMM3.9  | HMM5        | 26                      | 874.2      | 913.3      | 732.3      | 330.9      | 1092.8     | 1008.9     | 468.7      |
| HMM3.10 | HMM2+4      | 29                      | 848.2      | 942.1      | 733.1      | 353.8      | 1044.6     | 945.7      | 449.9      |
| HMM3.11 | HMM2+4      | 29                      | 191.3      | 855.4      | 492.5      | 263.3      | 644.9      | 313.5      | 57.9       |
| HMM3.12 | HMM2+4      | 32                      | 1852.3     | 851.0      | 461.8      | 216.3      | 581.3      | 314.1      | 37.9       |
| HMM3.13 | HMM3+5      | 29                      | 858.1      | 887.9      | 696.5      | 346.9      | 1075.5     | 917.2      | 406.2      |
| HMM3.14 | HMM3+5      | 29                      | 12.5       | 48.1       | 60.6       | <b>0.0</b> | 34.6       | <b>0.0</b> | 41.2       |
| HMM3.15 | HMM3+5      | 32                      | 1738.7     | 8.3        | 396.5      | 354.0      | <b>0.0</b> | 523.0      | <b>0.0</b> |

| model   | model class | treatment<br>parameters | 40CR       | 40CR       | 40CR       | 40CR       | 40CR       | 40CR       | 40CR       | 40CR       |
|---------|-------------|-------------------------|------------|------------|------------|------------|------------|------------|------------|------------|
|         |             |                         | 7          | 28         | 30         | 34         | 44         | 48         | 58         | 62         |
| HMM2.1  | HMM1        | 11                      | 6109       | 6333       | 7952       | 7139       | 5742       | 6181       | 7183       | 7391       |
| HMM2.2  | HMM2        | 13                      | 6102       | 6292       | 7890       | 7023       | 5720       | 6182       | 7171       | 7377       |
| HMM2.3  | HMM2        | 13                      | 5987       | 5592       | 7605       | 5783       | 4776       | 5935       | 6959       | 6948       |
| HMM2.4  | HMM2        | 15                      | 5964       | 5564       | 7501       | 5703       | 4750       | 5930       | 6861       | 6864       |
| HMM2.5  | HMM3        | 13                      | 6107       | 6267       | 7911       | 6993       | 5702       | 6163       | 7130       | 7377       |
| HMM2.6  | HMM3        | 13                      | 5725       | 5207       | 7359       | 5711       | 4158       | 5529       | 6908       | 6700       |
| HMM2.7  | HMM3        | 15                      | 5724       | 5149       | 8148       | 6334       | 4094       | 6027       | 6873       | 6580       |
| HMM2.8  | HMM4        | 13                      | 6109       | 6335       | 7944       | 7128       | 5742       | 6172       | 7174       | 7393       |
| HMM2.9  | HMM5        | 13                      | 6099       | 6330       | 7952       | 7112       | 5740       | 6177       | 7174       | 7389       |
| HMM2.10 | HMM2+4      | 15                      | 6103       | 6295       | 7878       | 7011       | 5719       | 6172       | 7165       | 7379       |
| HMM2.11 | HMM2+4      | 15                      | 5989       | 5594       | 7604       | 5786       | 4771       | 5903       | 6949       | 6943       |
| HMM2.12 | HMM2+4      | 17                      | 5967       | 5564       | 7497       | 5704       | 4742       | 5891       | 6848       | 6856       |
| HMM2.13 | HMM3+5      | 15                      | 6094       | 6290       | 7890       | 6988       | 5717       | 6176       | 7164       | 7377       |
| HMM2.14 | HMM3+5      | 15                      | 5721       | 5207       | 7362       | 5715       | 4158       | 5531       | 6902       | 6704       |
| HMM2.15 | HMM3+5      | 17                      | 5721       | 5152       | 7202       | 5645       | 4092       | 5425       | 6866       | 6583       |
| HMM3.1  | HMM1        | 20                      | 432.7      | 1084.1     | 1057.1     | 2029.6     | 1414.9     | 798.8      | 181.4      | 1183.5     |
| HMM3.2  | HMM2        | 23                      | 420.3      | 978.8      | 981.5      | 1913.9     | 1241.0     | 787.5      | 162.7      | 1165.0     |
| HMM3.3  | HMM2        | 23                      | 315.4      | 438.2      | 680.1      | 109.3      | 617.7      | 442.9      | 81.2       | 661.9      |
| HMM3.4  | HMM2        | 26                      | 325.0      | 428.6      | 595.3      | 85.9       | 597.5      | 418.6      | 54.9       | 591.7      |
| HMM3.5  | HMM3        | 23                      | 432.9      | 989.9      | 1027.5     | 1942.7     | 1212.5     | 767.3      | 142.2      | 1185.9     |
| HMM3.6  | HMM3        | 23                      | 8.8        | 47.9       | 133.1      | 44.9       | 237.9      | 114.0      | 25.0       | 103.9      |
| HMM3.7  | HMM3        | 26                      | 7.4        | 34.0       | 11.9       | 1211.1     | 191.0      | 54.5       | 11.8       | 25.2       |
| HMM3.8  | HMM4        | 26                      | 440.8      | 1068.7     | 1053.2     | 2016.6     | 1358.4     | 808.4      | 189.8      | 1178.6     |
| HMM3.9  | HMM5        | 26                      | 426.3      | 1056.4     | 1041.0     | 1978.7     | 1224.7     | 725.3      | 178.0      | 1158.4     |
| HMM3.10 | HMM2+4      | 29                      | 427.9      | 961.1      | 975.2      | 1902.2     | 1167.6     | 797.2      | 159.4      | 1159.1     |
| HMM3.11 | HMM2+4      | 29                      | 326.0      | 429.7      | 683.7      | 109.3      | 594.2      | 451.9      | 79.9       | 657.3      |
| HMM3.12 | HMM2+4      | 32                      | 3998.8     | 420.4      | 597.0      | 84.3       | 570.8      | 427.9      | 54.0       | 586.1      |
| HMM3.13 | HMM3+5      | 29                      | 426.6      | 958.0      | 1011.0     | 1892.3     | 1020.7     | 690.5      | 125.5      | 1160.2     |
| HMM3.14 | HMM3+5      | 29                      | 2.6        | 16.2       | 121.9      | 9.9        | 68.0       | 58.5       | 14.3       | 79.2       |
| HMM3.15 | HMM3+5      | 32                      | <b>0.0</b> | <b>0.0</b> | <b>0.0</b> | <b>0.0</b> | <b>0.0</b> | <b>0.0</b> | <b>0.0</b> | <b>0.0</b> |

Supplementary Figure 2. Sample quantile-theoretical quantile plots for the final model of each mouse. Quantiles are derived from the standardised pseudo-residuals and expected to follow a normal distribution (solid line).

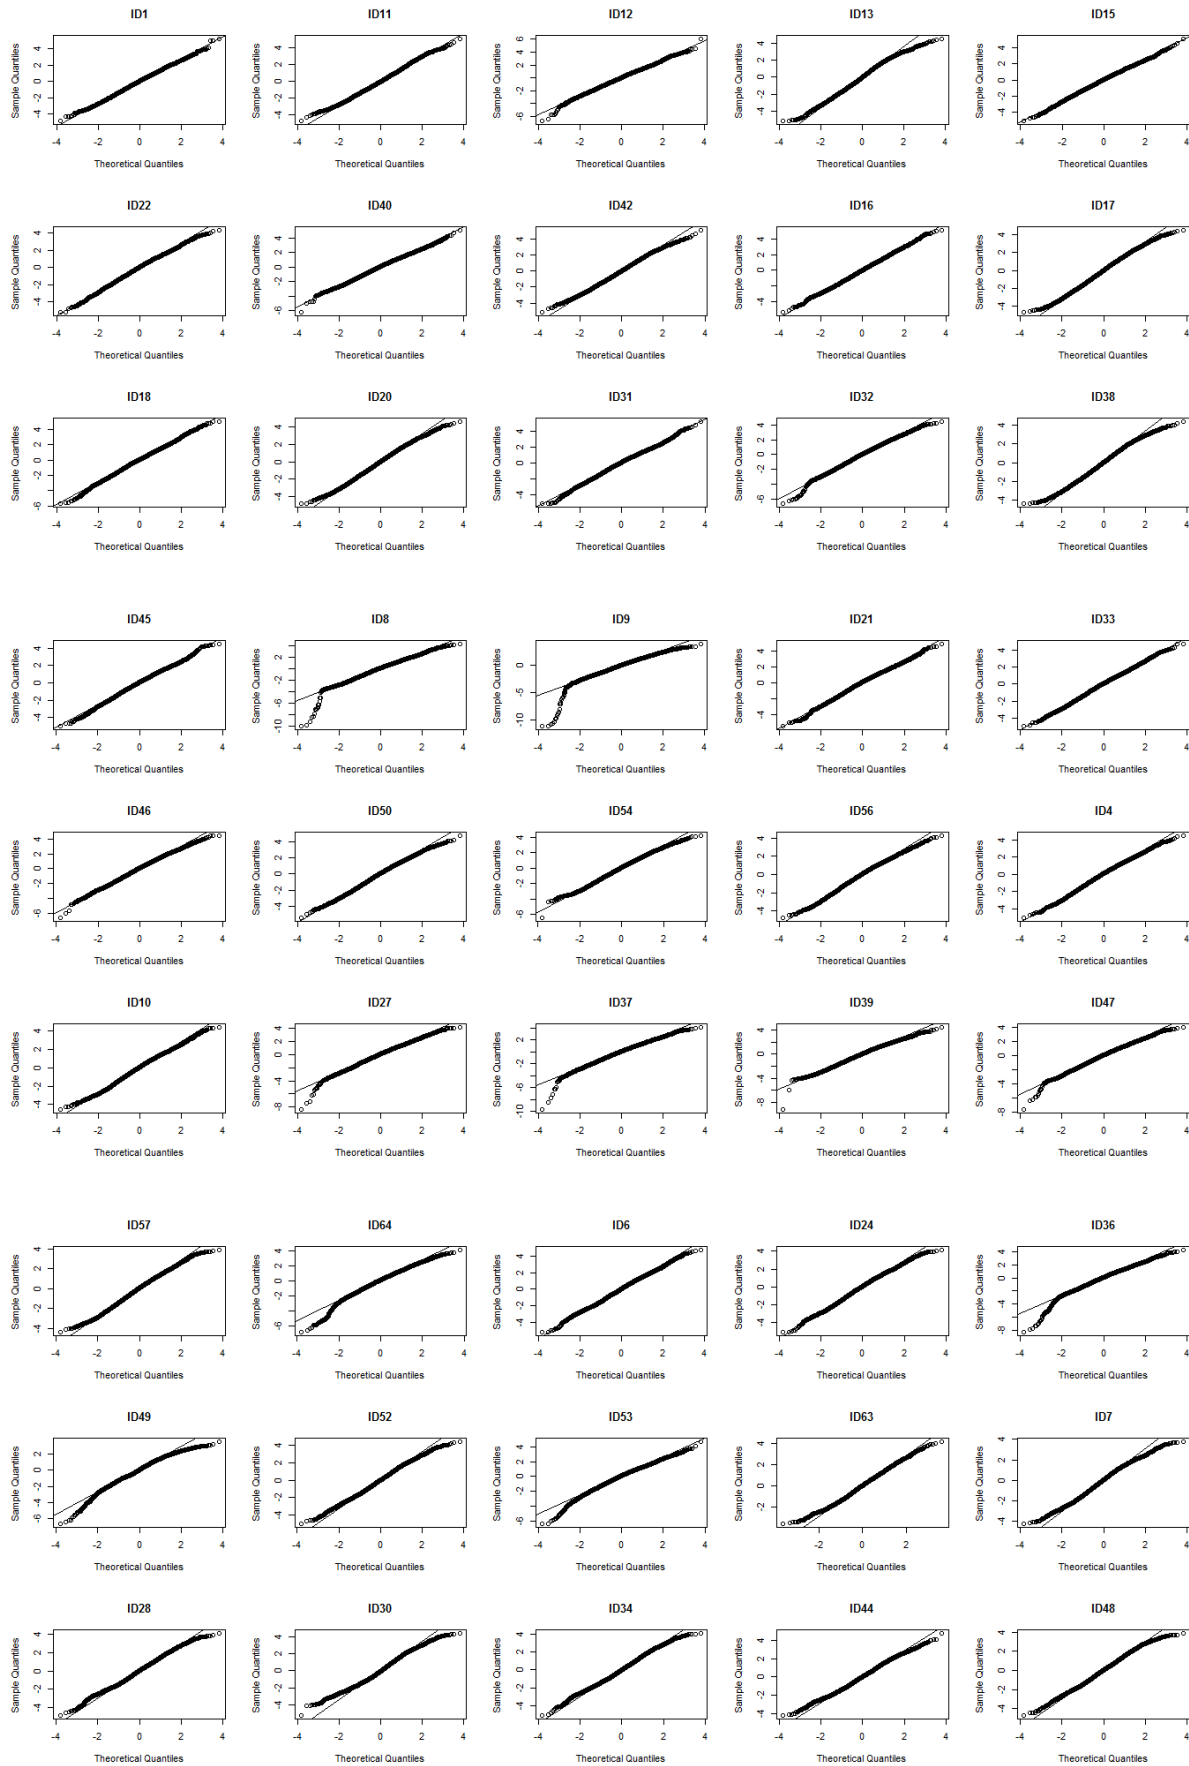



Supplementary Figure 3. Activity budget of mice throughout the CR treatment derived from the Viterbi sequence estimated from the posterior probabilities of activity state estimated by the best model for each 15-min interval for each mouse. Activity budgets are presented for the light and dark phases given the known diurnal cycle in mice activity. Note that the observed differences between these two phases were not explicitly incorporated in the model structure (Table 1) but instead emerge from the model fit.

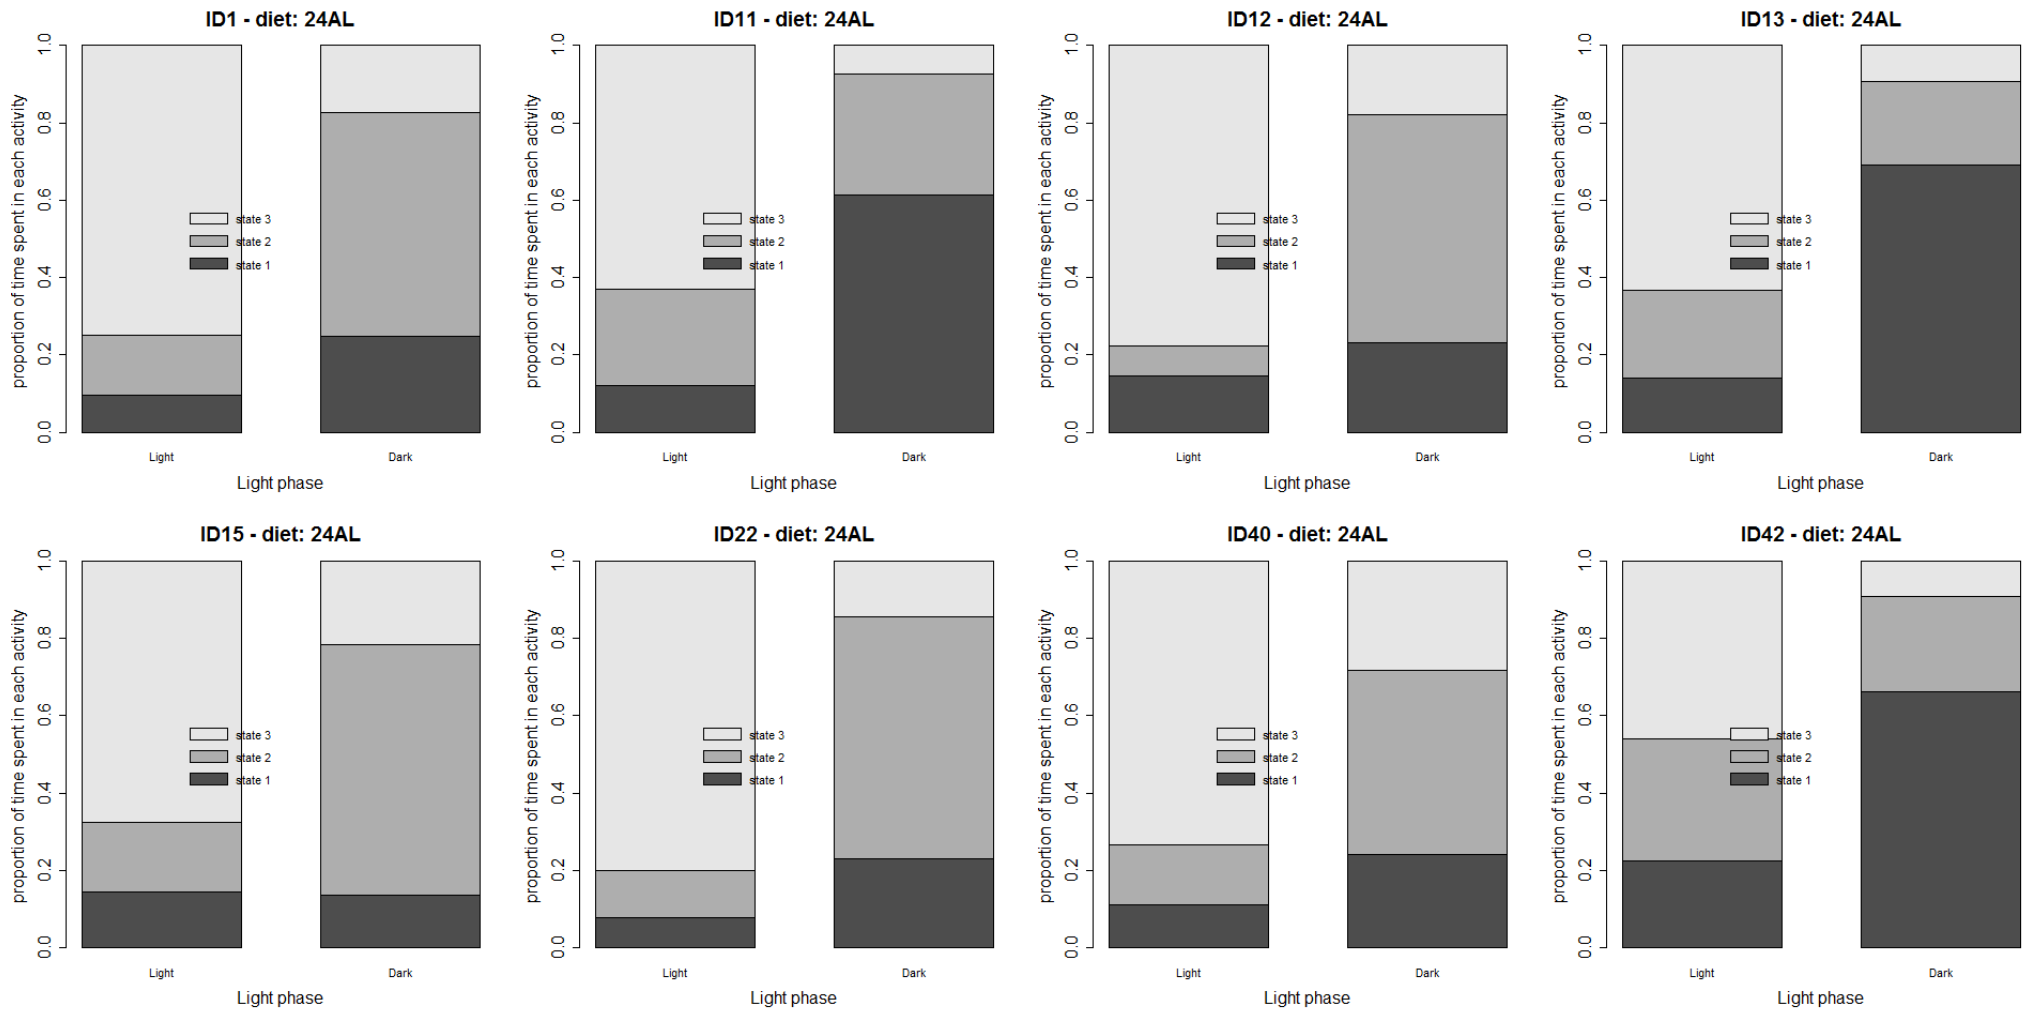

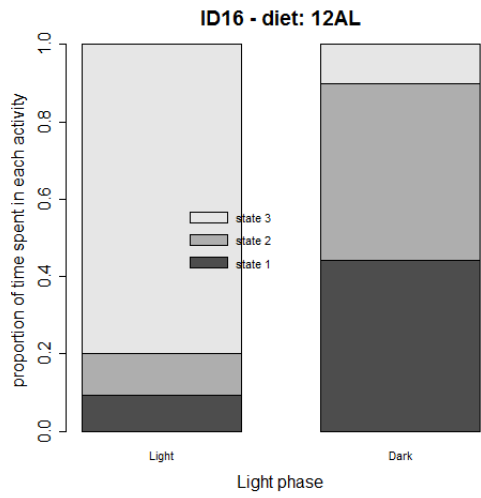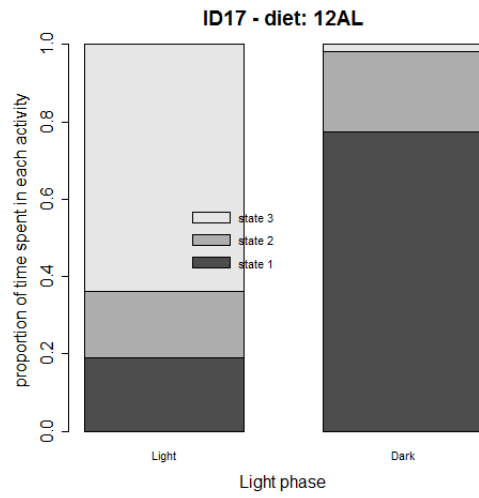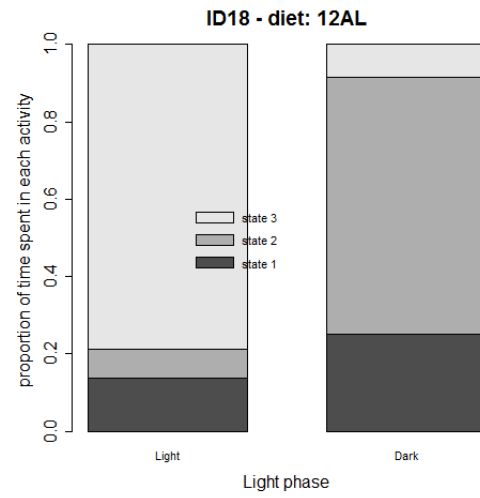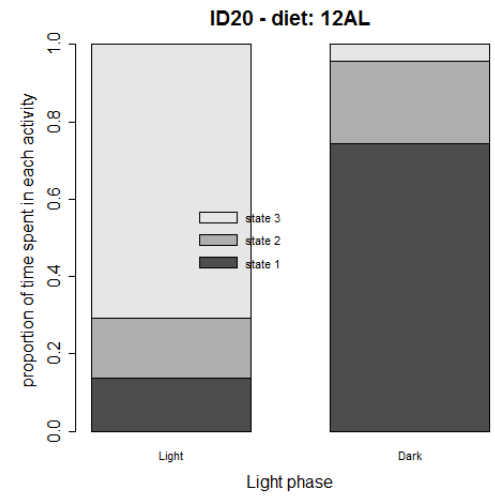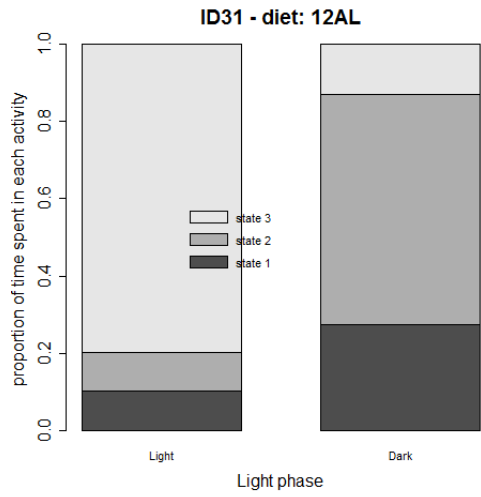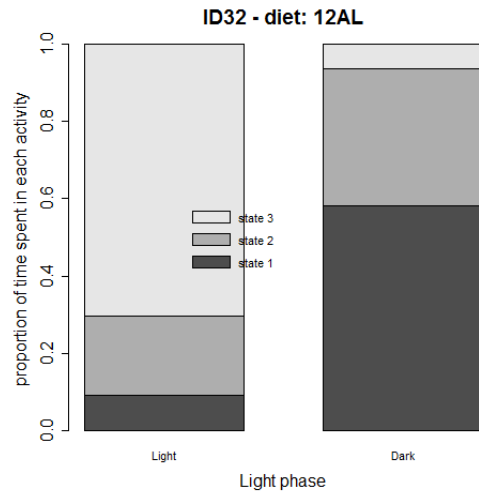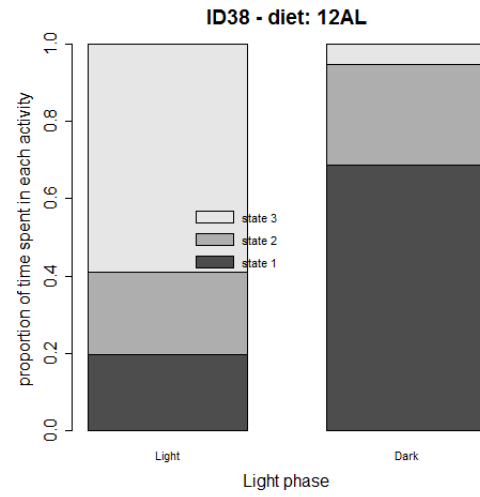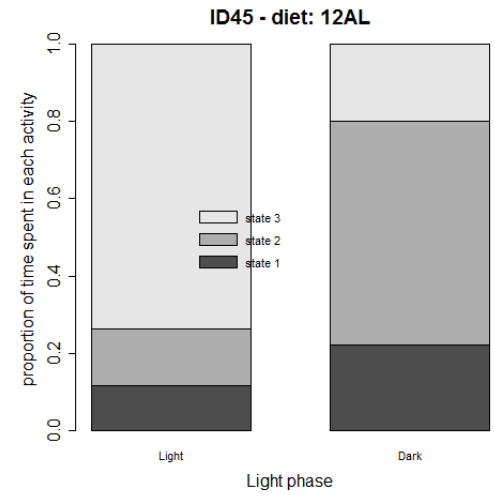

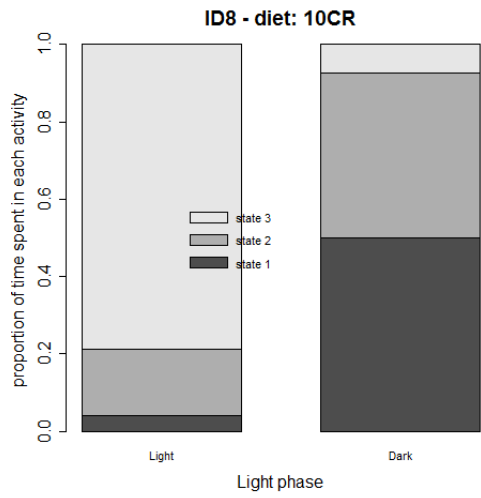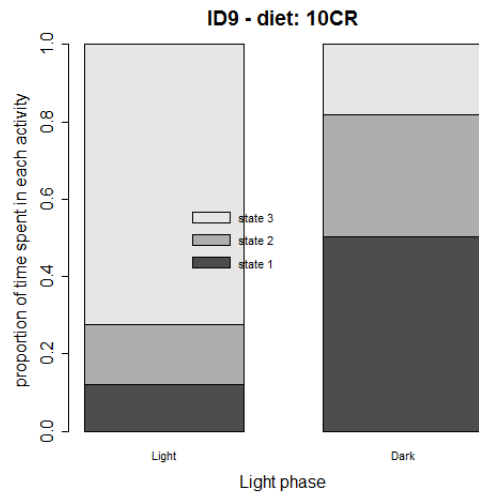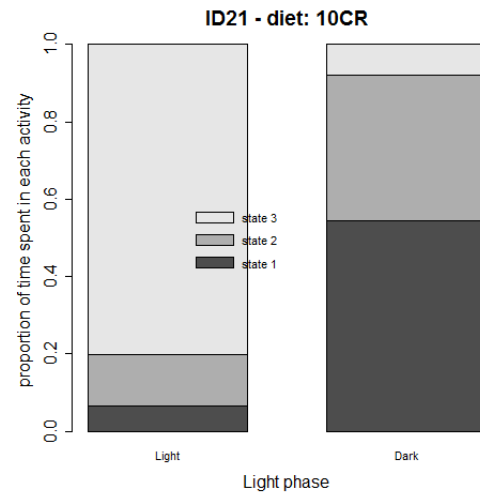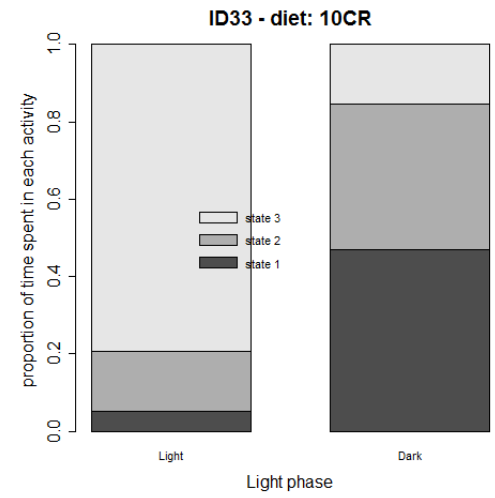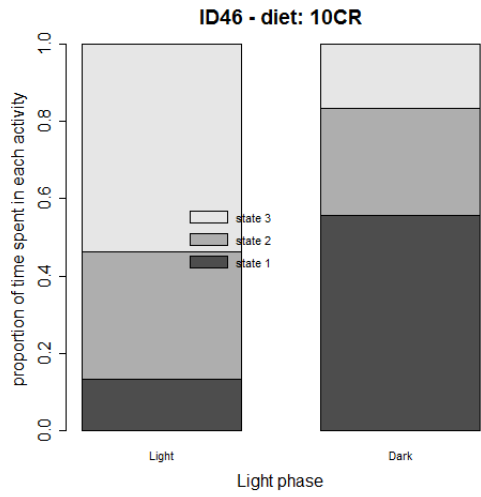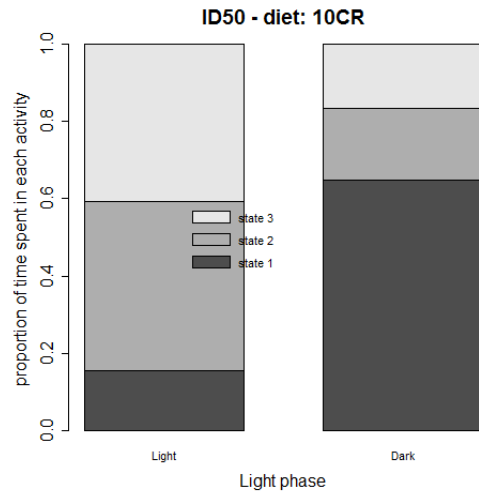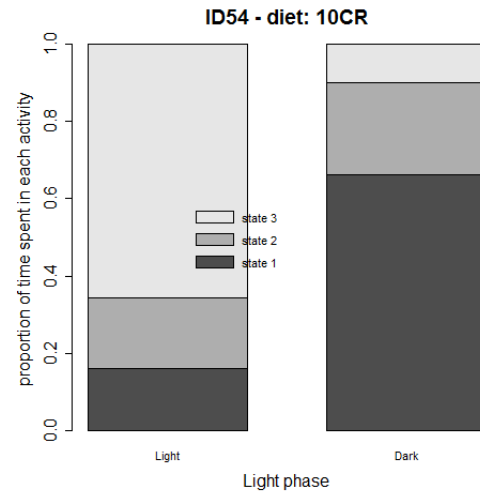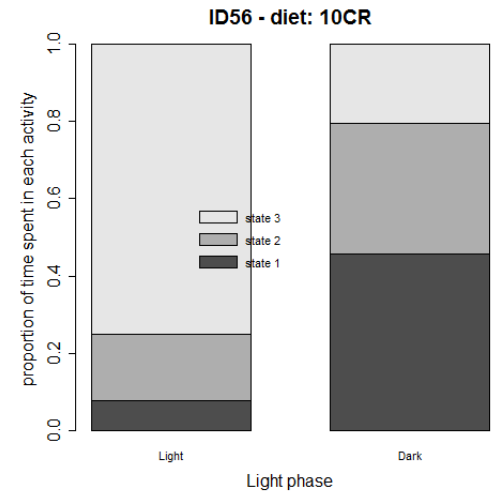

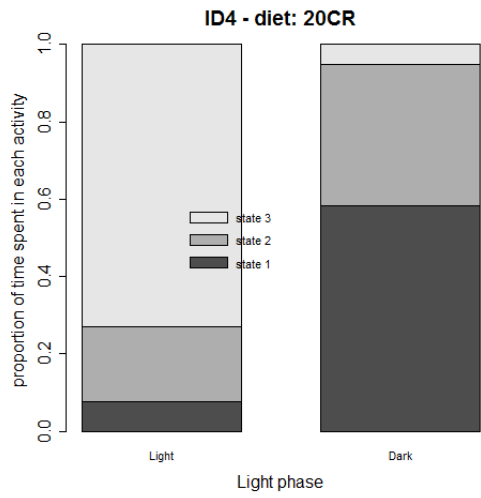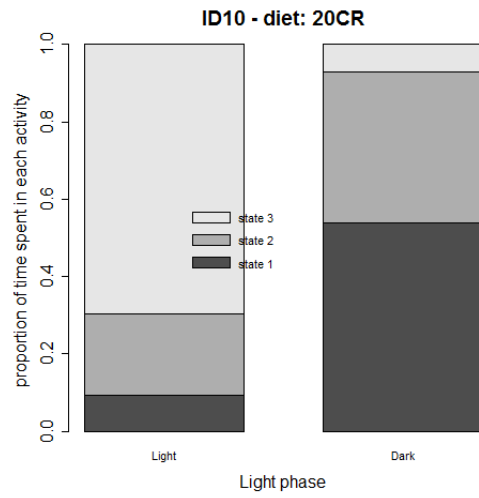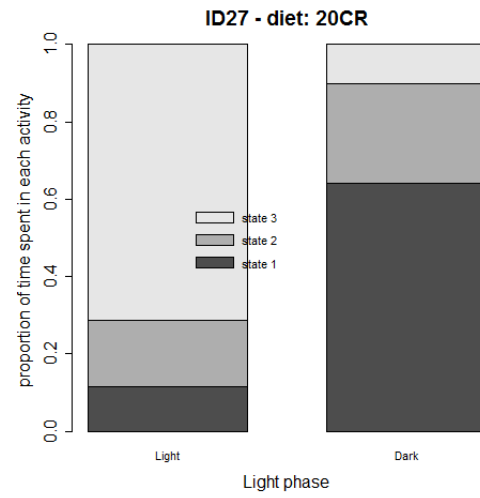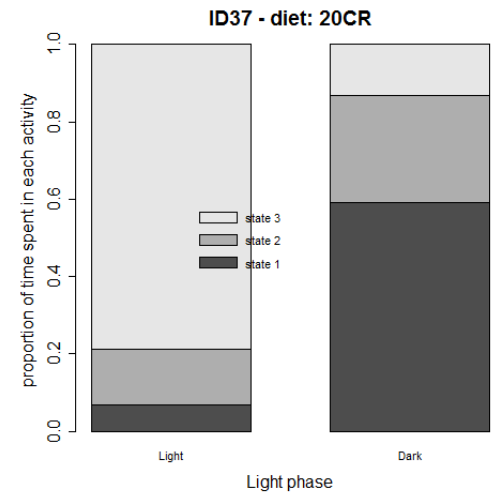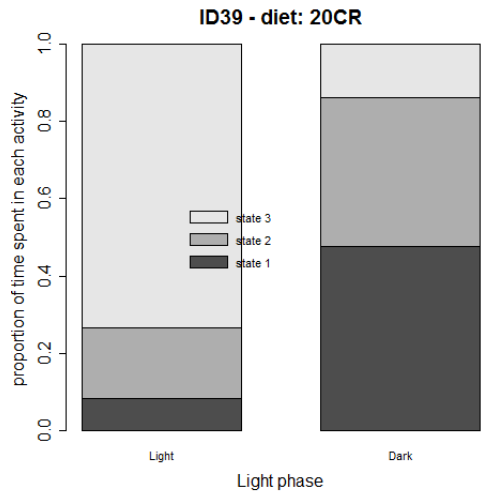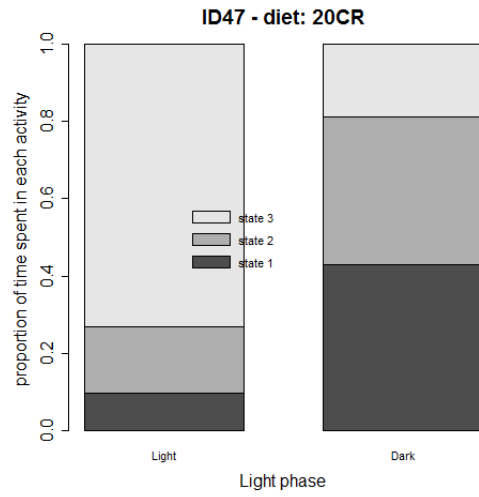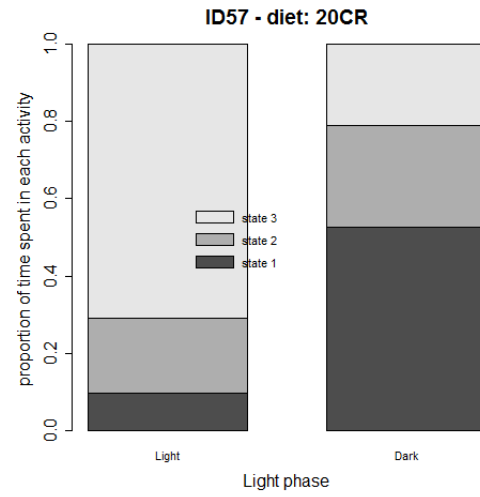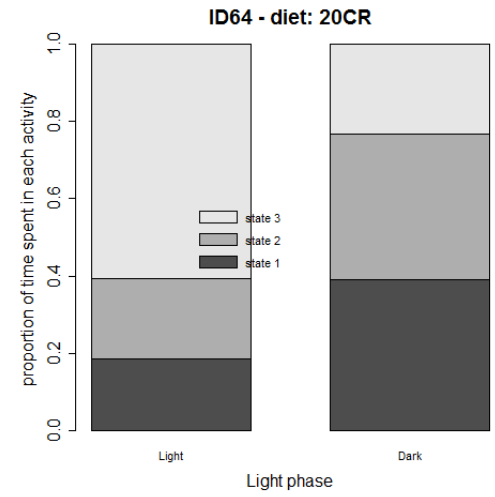

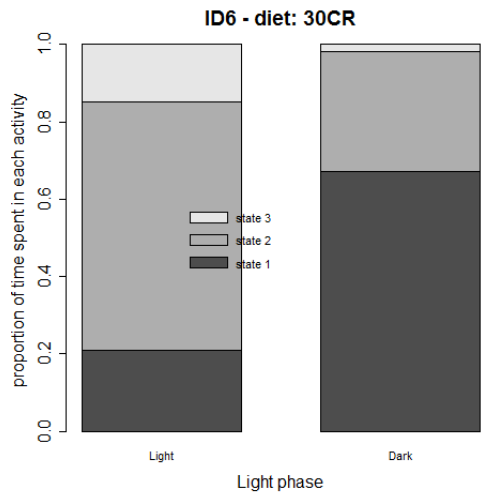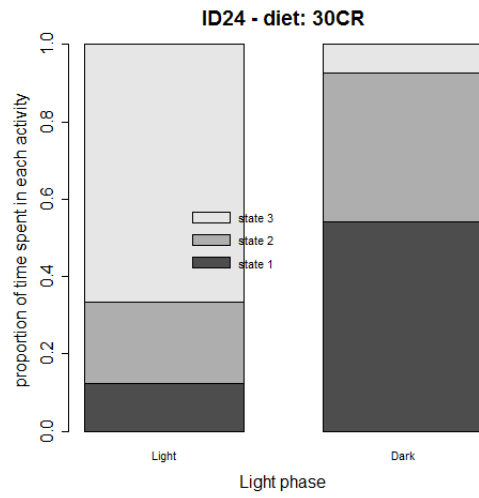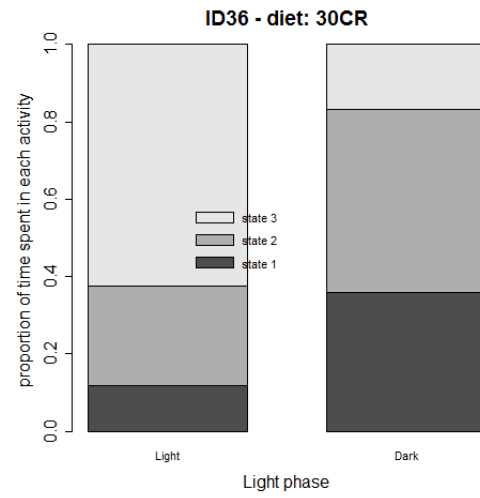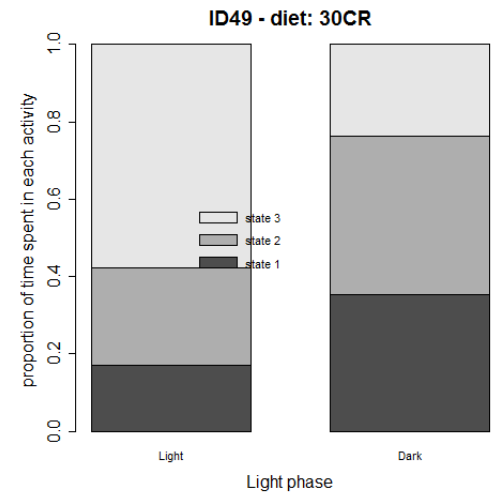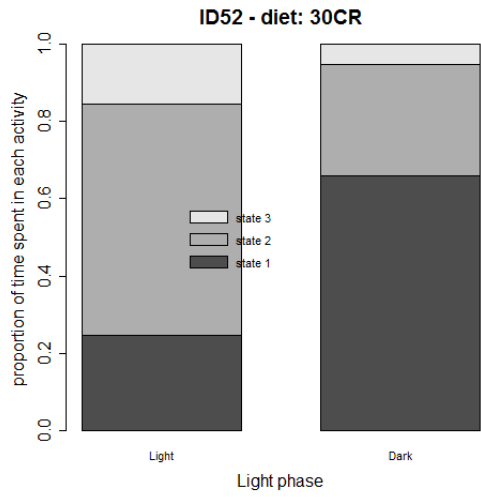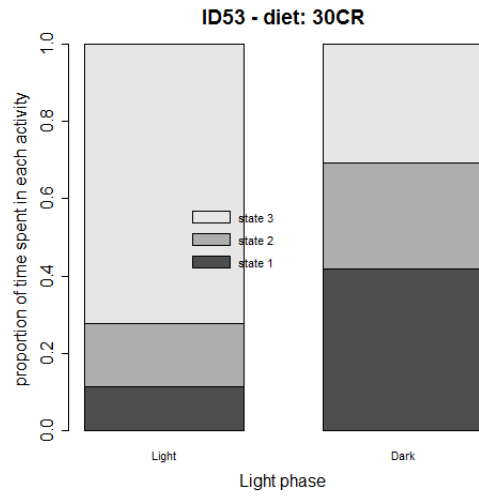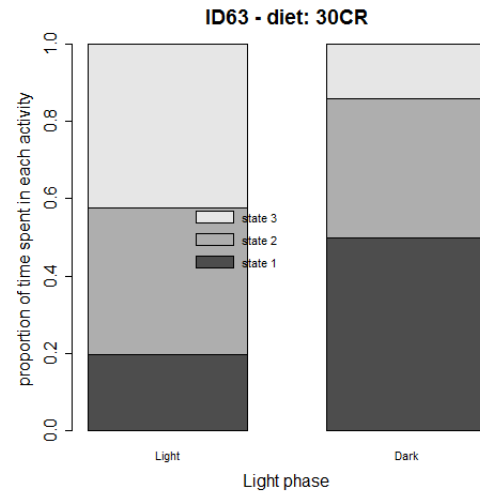

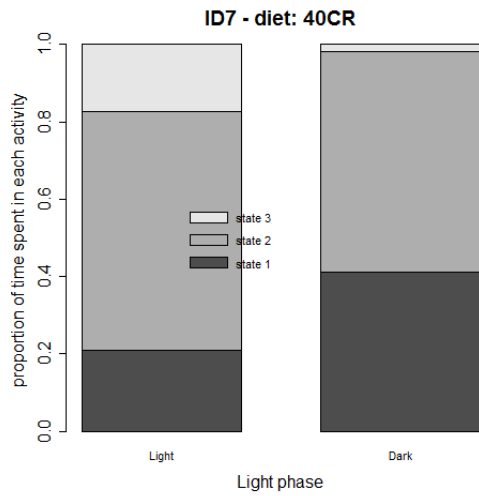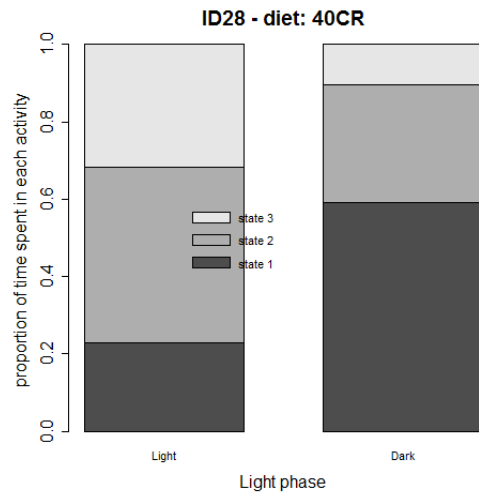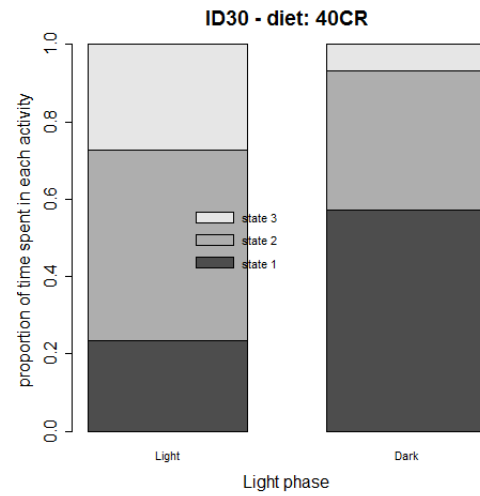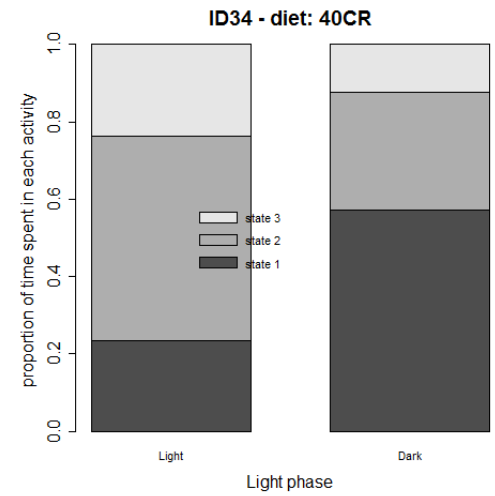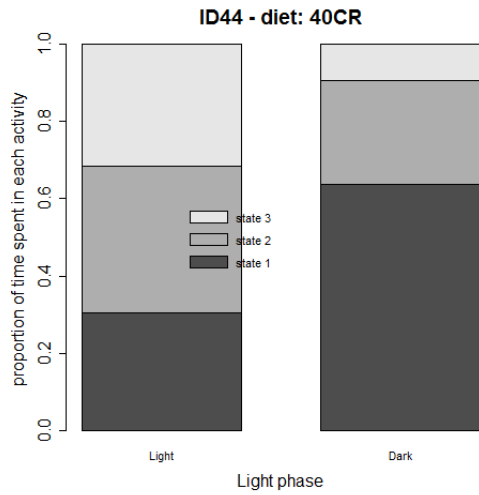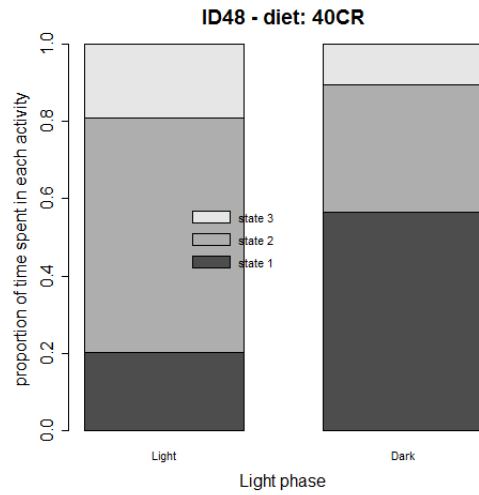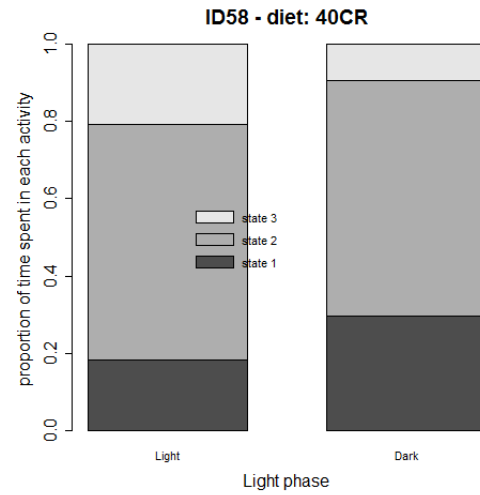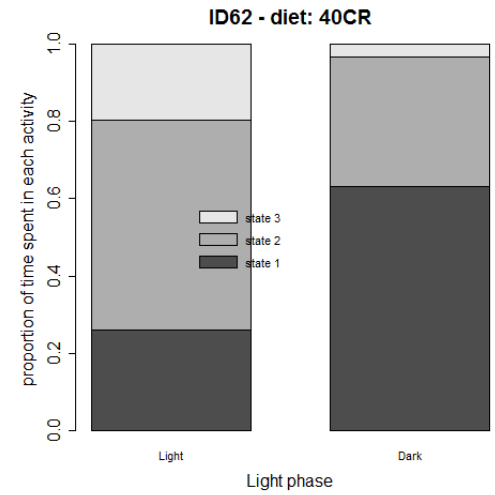

Supplement: srep13198-s1.pdf [file srep13198-s1.pdf]
